# Supplementary material for: Molecular-level study on the role of methanesulfonic acid in iodine oxoacids nucleation
Source: Copernicus journal article supplement (doi:10.5194/egusphere-2023-2084), 2023-10-11
Supplement: Supplementary file 1 [file egusphere-2023-2084-supplement.pdf]

*Supplement of*

## **Molecular-level study on the role of methanesulfonic acid in iodine oxoacids nucleation**

**Jing Li et al.**

Corresponding author: An Ning (anning@bit.edu.cn) and Xiuhui Zhang (zhangxiuhui@bit.edu.cn)

The copyright of individual parts of the supplement might differ from the article licence.

# Table of Contents

## Supplementary Methods

### Multi-step cluster conformational searching method.

**Figure S1.** Number of hydrogen bonds (HBs) and halogen bonds (XBs) in the HIO<sub>3</sub>-HIO<sub>2</sub> clusters and HIO<sub>3</sub>-HIO<sub>2</sub>-MSA clusters.

**Figure S2.** The branch ratio of different flux out of HIO<sub>3</sub>-HIO<sub>2</sub>-MSA-based system at (a)  $T = 278$  K,  $[\text{HIO}_3] = 1.0 \times 10^6$ ,  $[\text{HIO}_2] = 2.0 \times 10^4$ ,  $[\text{MSA}] = 10^6 - 10^8$  molec. cm<sup>-3</sup>, and (b)  $T = 278$  K,  $[\text{HIO}_3] = 10^6 - 10^8$ ,  $[\text{HIO}_2] = 2.0 \times 10^4 - 2.0 \times 10^6$ ,  $[\text{MSA}] = 1.0 \times 10^7$  molec. cm<sup>-3</sup>.

**Figure S3.** The branch ratio of different flux out of HIO<sub>3</sub>-HIO<sub>2</sub>-MSA-based system at (a)  $T = 268$  K,  $[\text{HIO}_3] = 1.0 \times 10^6$ ,  $[\text{HIO}_2] = 2.0 \times 10^4$ ,  $[\text{MSA}] = 10^6 - 10^8$  molec. cm<sup>-3</sup>, (b)  $T = 268$  K,  $[\text{HIO}_3] = 10^6 - 10^8$ ,  $[\text{HIO}_2] = 2.0 \times 10^4 - 2.0 \times 10^6$ ,  $[\text{MSA}] = 1.0 \times 10^7$  molec. cm<sup>-3</sup>, and (c)  $T = 268$  K,  $[\text{HIO}_3] = 10^6 - 10^8$ ,  $[\text{HIO}_2] = 2.0 \times 10^4 - 2.0 \times 10^6$ ,  $[\text{MSA}] = 1.0 \times 10^8$  molec. cm<sup>-3</sup>.

**Figure S4.** The Gibbs free energies of formation ( $\Delta G$ , kcal mol<sup>-3</sup>) of the growing clusters as a function of growth step in HIO<sub>3</sub>-HIO<sub>2</sub>-MSA nucleation system at  $T = 268$  K,  $[\text{HIO}_3] = 1.0 \times 10^6$ ,  $[\text{HIO}_2] = 2.0 \times 10^4$ , and  $[\text{MSA}] = 5.0 \times 10^6$  molec. cm<sup>-3</sup>.

**Figure S5.** Comparison with the simulated cluster formation rates ( $J$ , cm<sup>-3</sup> s<sup>-1</sup>) and field observations at the ambient conditions of (a) Réunion ( $T = 288$  K,  $\text{CS} = 2.0 \times 10^{-3}$  s<sup>-1</sup>,  $[\text{HIO}_3] = 10^5 - 3.0 \times 10^6$ ,  $[\text{HIO}_2] = 2.0 \times 10^3 - 6.0 \times 10^4$ , and  $[\text{MSA}] = 10^6 - 10^8$  molec. cm<sup>-3</sup>), (b) Mace Head ( $T = 287$  K,  $\text{CS} = 2.0 \times 10^{-3}$  s<sup>-1</sup>,  $[\text{HIO}_3] = 10^7 - 10^8$ ,  $[\text{HIO}_2] = 2.0 \times 10^5 - 2.0 \times 10^6$ , and  $[\text{MSA}] = 10^6 - 10^7$  molec. cm<sup>-3</sup>). The orange area, purple line and gray area represent  $J(\text{HIO}_3\text{-HIO}_2\text{-MSA})$ ,  $J(\text{HIO}_3\text{-HIO}_2)$ , and  $J(\text{Field observation})$ , respectively.

**Table S1.** The Gibbs formation free energies  $\Delta G_{\text{ref}}$  (kcal mol<sup>-1</sup>) of the studied HIO<sub>3</sub>-HIO<sub>2</sub>-MSA clusters at the RICC2/aug-cc-pV(T+d)Z(-PP)// $\omega$ B97X-D/6-311++G(3df,3pd) + aug-cc-pVTZ-PP with ECP28MDF (for I) level of theory,  $p = 1$  atm and  $T = 268, 278, 288$ , and  $298$  K.

**Table S2.** The bond type, electron density  $\rho(r)$  (a.u.), Laplacian electron density  $\nabla^2\rho(r)$  (a.u.),

energy density  $H(r)$  at the corresponding bond critical points (BCPs) in the studied HIO<sub>3</sub>-HIO<sub>2</sub>-MSA-based clusters. The orange balls represent BCPs in the AIM theory analysis. HIO<sub>3</sub>, HIO<sub>2</sub>, and MSA are the shorthand for iodic acid, iodous acid and methanesulfonic acid, respectively. HB (hydrogen bond), XB (halogen bond).

**Table S3.** The boundary conditions of ACDC simulations at 268, 278, 288, and 298 K, respectively.

**Table S4.** The ratios of HIO<sub>3</sub> monomer collision frequencies versus total evaporation rate coefficients ( $\beta C/\Sigma\gamma$ ) at  $T = 268, 278, 288,$  and  $298$  K.  $\beta$  is the rate coefficient of cluster collision with HIO<sub>3</sub> monomer, and  $C$  is the concentration of HIO<sub>3</sub> monomer ( $1.0 \times 10^6$  molec. cm<sup>-3</sup>).

**Table S5.** The evaporation rate coefficients ( $\gamma, \text{s}^{-1}$ ) of the studied clusters at 278 K.

**Table S6.** Cartesian coordinates of all clusters in the present study at the  $\omega$ B97X-D/6-311++G(3df,3pd) + aug-cc-pVTZ-PP with ECP28MDF (for I) level of theory.

## Supplementary Methods

### Multi-step cluster conformational searching method.

First, the artificial bee colony algorithm combined with Universal force field (UFF) (Rappé et al., 1992) was employed to yield more than 7000000 initial configurations for each cluster by ABCcluster software (Zhang and Dolg, 2015). Then up to 1000 relatively stable structures were selected to pre-optimized at the PM7 semiempirical method (Stewart, 2013) by MOPAC 2016 (Stewart, 2016). Next, about 100 structures with the lowest energy were selected to further optimized at the  $\omega$ B97X-D/6-31+G\* (for C, H, O and S atoms) + Lanl2DZ (for I atom) level of theory (Elm and Kristensen, 2017) by Gaussian 09 software (Frisch et al., 2009). Finally, the lower-lying 10 isomers were selected and reoptimized at the  $\omega$ B97X-D function and 6-311++G (3df, 3pd) (for C, H, O and S atoms) + aug-cc-pVTZ-PP with ECP28MDF (for I atom) level of theory to obtain the global minimum one (Francl et al., 1982; Peterson et al., 2003).

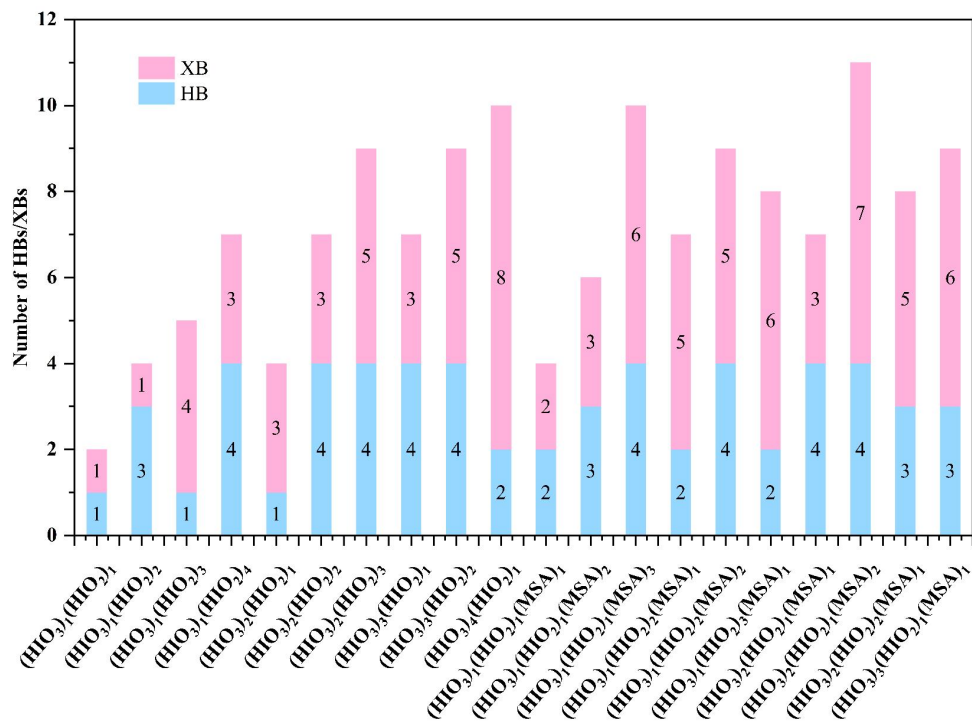

**Figure S1.** Number of hydrogen bonds (HBs) and halogen bonds (XBs) in the HIO<sub>3</sub>-HIO<sub>2</sub> clusters and HIO<sub>3</sub>-HIO<sub>2</sub>-MSA clusters.

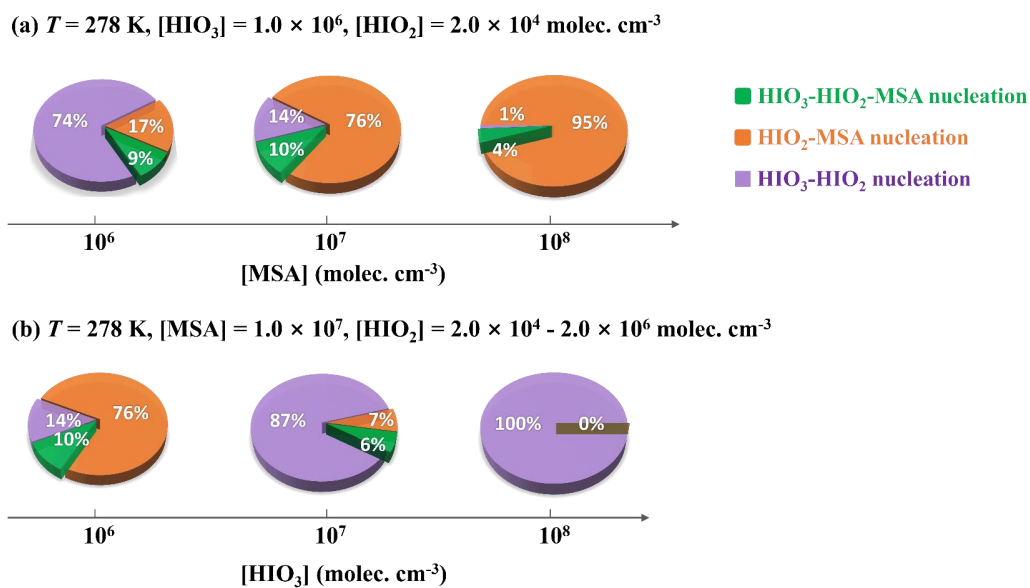

**Figure S2.** The branch ratio of different flux out of HIO<sub>3</sub>-HIO<sub>2</sub>-MSA-based system at (a)  $T = 278$  K,  $[\text{HIO}_3] = 1.0 \times 10^6$ ,  $[\text{HIO}_2] = 2.0 \times 10^4$ ,  $[\text{MSA}] = 10^6 - 10^8$  molec.  $\text{cm}^{-3}$ , and (b)  $T = 278$  K,  $[\text{HIO}_3] = 10^6 - 10^8$ ,  $[\text{HIO}_2] = 2.0 \times 10^4 - 2.0 \times 10^6$ ,  $[\text{MSA}] = 1.0 \times 10^7$  molec.  $\text{cm}^{-3}$ .

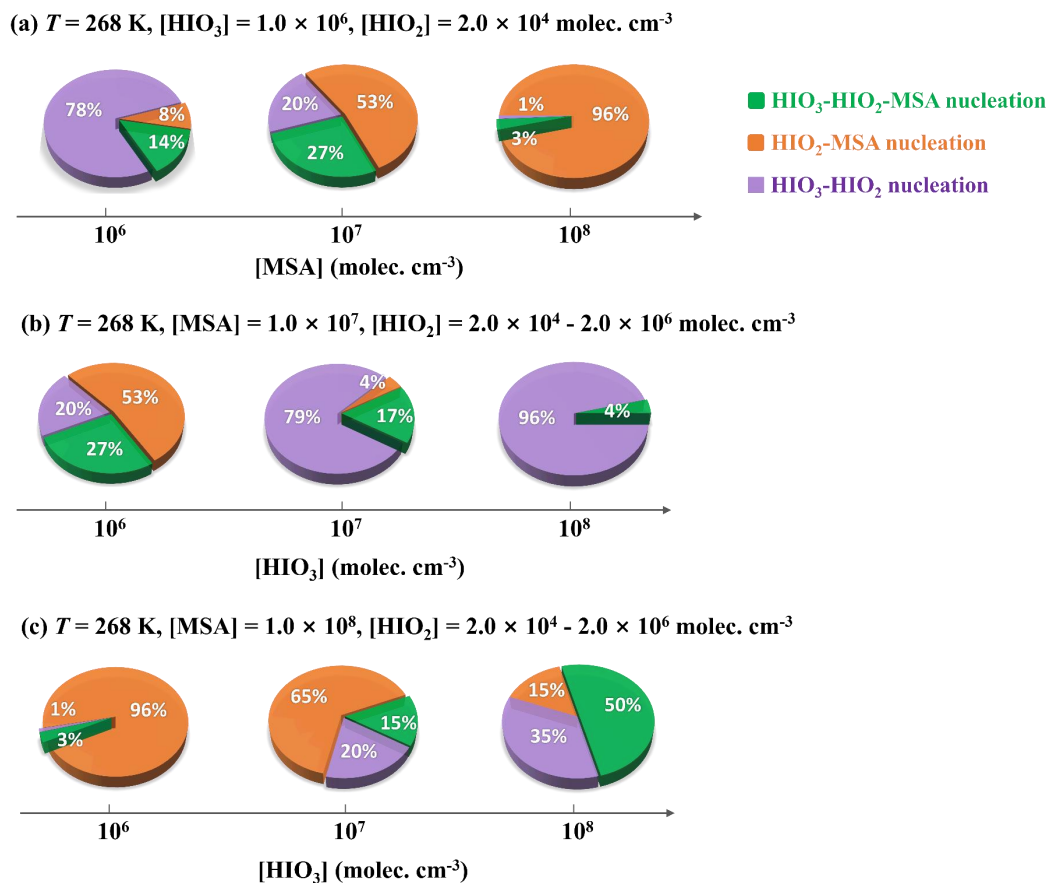

**Figure S3.** The branch ratio of different flux out of HIO<sub>3</sub>-HIO<sub>2</sub>-MSA-based system at (a)  $T = 268$  K,  $[\text{HIO}_3] = 1.0 \times 10^6$ ,  $[\text{HIO}_2] = 2.0 \times 10^4$ ,  $[\text{MSA}] = 10^6 - 10^8$  molec.  $\text{cm}^{-3}$ , (b)  $T = 268$  K,  $[\text{HIO}_3] = 10^6 - 10^8$ ,  $[\text{HIO}_2] = 2.0 \times 10^4 - 2.0 \times 10^6$ ,  $[\text{MSA}] = 1.0 \times 10^7$  molec.  $\text{cm}^{-3}$ , and (c)  $T = 268$  K,  $[\text{HIO}_3] = 10^6 - 10^8$ ,  $[\text{HIO}_2] = 2.0 \times 10^4 - 2.0 \times 10^6$ ,  $[\text{MSA}] = 1.0 \times 10^8$  molec.  $\text{cm}^{-3}$ .

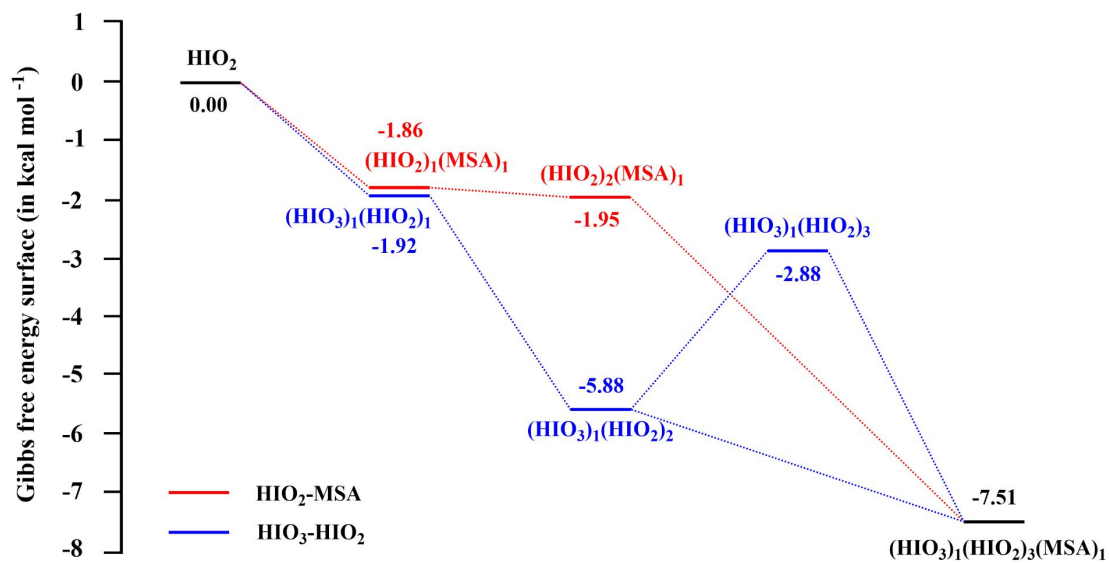

**Figure S4.** The Gibbs free energies of formation ( $\Delta G$ , kcal mol<sup>-3</sup>) of the growing clusters as a function of growth step in HIO<sub>3</sub>-HIO<sub>2</sub>-MSA nucleation system at  $T = 268$  K,  $[\text{HIO}_3] = 1.0 \times 10^6$ ,  $[\text{HIO}_2] = 2.0 \times 10^4$ , and  $[\text{MSA}] = 5.0 \times 10^6$  molec. cm<sup>-3</sup>.



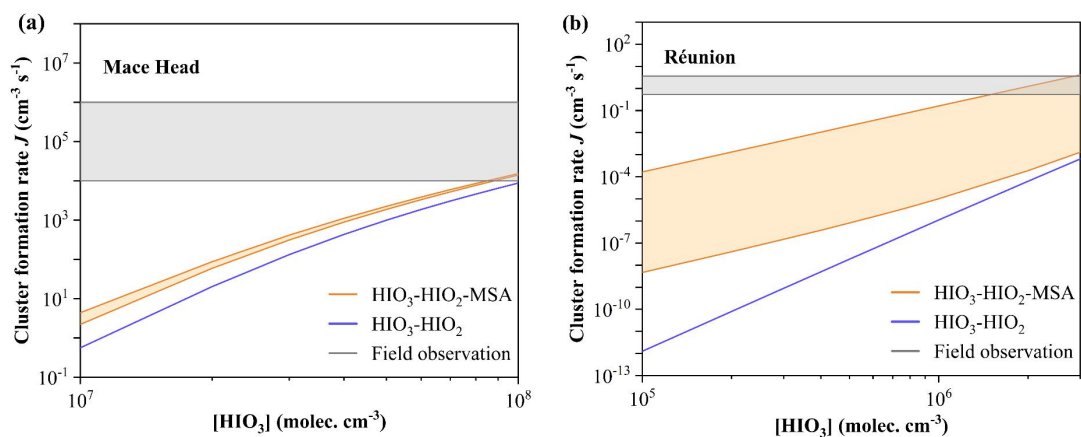

**Figure S5.** Comparison with the simulated cluster formation rates ( $J$ ,  $\text{cm}^{-3} \text{s}^{-1}$ ) and field observations at the ambient conditions of (a) Mace Head ( $T = 287 \text{ K}$ ,  $\text{CS} = 2.0 \times 10^{-3} \text{ s}^{-1}$ ,  $[\text{HIO}_3] = 10^7 - 10^8$ ,  $[\text{HIO}_2] = 2.0 \times 10^5 - 2.0 \times 10^6$ , and  $[\text{MSA}] = 10^6 - 10^7 \text{ molec. cm}^{-3}$ ), (b) Réunion ( $T = 288 \text{ K}$ ,  $\text{CS} = 2.0 \times 10^{-3} \text{ s}^{-1}$ ,  $[\text{HIO}_3] = 10^5 - 3.0 \times 10^6$ ,  $[\text{HIO}_2] = 2.0 \times 10^3 - 6.0 \times 10^4$ , and  $[\text{MSA}] = 10^6 - 10^8 \text{ molec. cm}^{-3}$ ). The orange area, purple line and gray area represent  $J(\text{HIO}_3\text{-HIO}_2\text{-MSA})$ ,  $J(\text{HIO}_3\text{-HIO}_2)$ , and  $J(\text{Field observation})$ .

**Table S1.** The Gibbs formation free energies  $\Delta G_{\text{ref}}$  (kcal mol<sup>-1</sup>) of the studied HIO<sub>3</sub>-HIO<sub>2</sub>-MSA clusters at the RICC2/aug-cc-pV(T+d)Z(-PP)// $\omega$ B97X-D/6-311++G(3df,3pd) + aug-cc-pVTZ-PP with ECP28MDF (for I) level of theory,  $p = 1$  atm and  $T = 268, 278, 288,$  and  $298$  K.

| Clusters                                                          | $\Delta G_{\text{ref}}$ (kcal mol <sup>-1</sup> ) |        |        |        |
|-------------------------------------------------------------------|---------------------------------------------------|--------|--------|--------|
|                                                                   | 268K                                              | 278K   | 288K   | 298K   |
| (HIO <sub>3</sub> ) <sub>2</sub>                                  | -8.45                                             | -8.07  | -7.70  | -7.33  |
| (HIO <sub>3</sub> ) <sub>3</sub>                                  | -19.26                                            | -18.46 | -17.68 | -16.89 |
| (HIO <sub>3</sub> ) <sub>4</sub>                                  | -39.70                                            | -38.46 | -37.26 | -36.03 |
| (HIO <sub>3</sub> ) <sub>5</sub>                                  | -57.93                                            | -56.26 | -54.64 | -52.99 |
| (HIO <sub>2</sub> ) <sub>2</sub>                                  | -18.05                                            | -17.63 | -17.22 | -16.80 |
| (HIO <sub>2</sub> ) <sub>3</sub>                                  | -39.72                                            | -39.06 | -38.02 | -37.38 |
| (HIO <sub>2</sub> ) <sub>4</sub>                                  | -59.98                                            | -58.69 | -57.45 | -56.17 |
| (HIO <sub>2</sub> ) <sub>5</sub>                                  | -77.63                                            | -75.92 | -74.26 | -72.57 |
| (MSA) <sub>2</sub>                                                | -11.37                                            | -10.97 | -10.57 | -10.16 |
| (MSA) <sub>3</sub>                                                | -16.88                                            | -16.10 | -15.33 | -14.55 |
| (HIO <sub>3</sub> ) <sub>1</sub> (HIO <sub>2</sub> ) <sub>1</sub> | -18.40                                            | -17.99 | -17.59 | -17.18 |
| (HIO <sub>3</sub> ) <sub>1</sub> (HIO <sub>2</sub> ) <sub>2</sub> | -40.62                                            | -39.77 | -38.94 | -38.10 |
| (HIO <sub>3</sub> ) <sub>1</sub> (HIO <sub>2</sub> ) <sub>3</sub> | -56.48                                            | -55.20 | -53.96 | -52.70 |
| (HIO <sub>3</sub> ) <sub>1</sub> (HIO <sub>2</sub> ) <sub>4</sub> | -82.51                                            | -80.75 | -79.05 | -77.30 |
| (HIO <sub>3</sub> ) <sub>2</sub> (HIO <sub>2</sub> ) <sub>1</sub> | -31.31                                            | -30.46 | -29.64 | -28.79 |
| (HIO <sub>3</sub> ) <sub>2</sub> (HIO <sub>2</sub> ) <sub>2</sub> | -56.42                                            | -55.18 | -53.97 | -52.73 |
| (HIO <sub>3</sub> ) <sub>2</sub> (HIO <sub>2</sub> ) <sub>3</sub> | -80.23                                            | -78.52 | -76.86 | -75.16 |
| (HIO <sub>3</sub> ) <sub>3</sub> (HIO <sub>2</sub> ) <sub>1</sub> | -52.92                                            | -51.67 | -50.45 | -49.21 |
| (HIO <sub>3</sub> ) <sub>3</sub> (HIO <sub>2</sub> ) <sub>2</sub> | -74.52                                            | -72.80 | -71.14 | -69.44 |
| (HIO <sub>3</sub> ) <sub>4</sub> (HIO <sub>2</sub> ) <sub>1</sub> | -66.16                                            | -64.48 | -62.84 | -61.18 |
| (HIO <sub>3</sub> ) <sub>1</sub> (MSA) <sub>1</sub>               | -11.71                                            | -11.31 | -10.93 | -10.54 |
| (HIO <sub>3</sub> ) <sub>1</sub> (MSA) <sub>2</sub>               | -20.56                                            | -19.77 | -19.00 | -18.22 |
| (HIO <sub>3</sub> ) <sub>1</sub> (MSA) <sub>3</sub>               | -36.06                                            | -34.81 | -33.59 | -32.34 |
| (HIO <sub>3</sub> ) <sub>2</sub> (MSA) <sub>1</sub>               | -21.80                                            | -21.00 | -20.22 | -19.42 |
| (HIO <sub>3</sub> ) <sub>2</sub> (MSA) <sub>2</sub>               | -33.13                                            | -31.89 | -30.69 | -29.46 |

---

|                                                                                      |        |        |        |        |
|--------------------------------------------------------------------------------------|--------|--------|--------|--------|
| (HIO <sub>3</sub> ) <sub>2</sub> (MSA) <sub>3</sub>                                  | -48.73 | -47.12 | -45.55 | -43.94 |
| (HIO <sub>3</sub> ) <sub>3</sub> (MSA) <sub>1</sub>                                  | -33.39 | -32.23 | -31.10 | -29.94 |
| (HIO <sub>3</sub> ) <sub>3</sub> (MSA) <sub>2</sub>                                  | -53.59 | -51.98 | -50.41 | -48.81 |
| (HIO <sub>3</sub> ) <sub>4</sub> (MSA) <sub>1</sub>                                  | -55.82 | -54.12 | -52.47 | -50.78 |
| (HIO <sub>2</sub> ) <sub>1</sub> (MSA) <sub>1</sub>                                  | -17.48 | -17.06 | -16.66 | -16.25 |
| (HIO <sub>2</sub> ) <sub>1</sub> (MSA) <sub>2</sub>                                  | -30.59 | -29.78 | -28.99 | -28.18 |
| (HIO <sub>2</sub> ) <sub>1</sub> (MSA) <sub>3</sub>                                  | -41.85 | -40.63 | -39.44 | -38.22 |
| (HIO <sub>2</sub> ) <sub>2</sub> (MSA) <sub>1</sub>                                  | -36.13 | -35.30 | -34.48 | -33.65 |
| (HIO <sub>2</sub> ) <sub>2</sub> (MSA) <sub>2</sub>                                  | -58.70 | -57.40 | -56.14 | -55.25 |
| (HIO <sub>2</sub> ) <sub>2</sub> (MSA) <sub>3</sub>                                  | -74.57 | -72.87 | -71.22 | -69.52 |
| (HIO <sub>2</sub> ) <sub>3</sub> (MSA) <sub>1</sub>                                  | -59.74 | -58.47 | -57.24 | -55.98 |
| (HIO <sub>2</sub> ) <sub>3</sub> (MSA) <sub>2</sub>                                  | -79.31 | -77.63 | -75.99 | -74.31 |
| (HIO <sub>2</sub> ) <sub>4</sub> (MSA) <sub>1</sub>                                  | -77.90 | -76.20 | -74.54 | -72.84 |
| (HIO <sub>3</sub> ) <sub>1</sub> (HIO <sub>2</sub> ) <sub>1</sub> (MSA) <sub>1</sub> | -30.42 | -29.58 | -28.77 | -27.93 |
| (HIO <sub>3</sub> ) <sub>1</sub> (HIO <sub>2</sub> ) <sub>1</sub> (MSA) <sub>2</sub> | -45.90 | -44.67 | -43.48 | -42.26 |
| (HIO <sub>3</sub> ) <sub>1</sub> (HIO <sub>2</sub> ) <sub>1</sub> (MSA) <sub>3</sub> | -60.92 | -59.25 | -57.62 | -55.95 |
| (HIO <sub>3</sub> ) <sub>1</sub> (HIO <sub>2</sub> ) <sub>2</sub> (MSA) <sub>1</sub> | -50.60 | -49.39 | -48.21 | -47.01 |
| (HIO <sub>3</sub> ) <sub>1</sub> (HIO <sub>2</sub> ) <sub>2</sub> (MSA) <sub>2</sub> | -71.42 | -69.75 | -68.13 | -66.47 |
| (HIO <sub>3</sub> ) <sub>1</sub> (HIO <sub>2</sub> ) <sub>3</sub> (MSA) <sub>1</sub> | -76.73 | -75.02 | -73.35 | -71.65 |
| (HIO <sub>3</sub> ) <sub>2</sub> (HIO <sub>2</sub> ) <sub>1</sub> (MSA) <sub>1</sub> | -46.33 | -45.06 | -43.82 | -42.56 |
| (HIO <sub>3</sub> ) <sub>2</sub> (HIO <sub>2</sub> ) <sub>1</sub> (MSA) <sub>2</sub> | -62.32 | -60.66 | -59.04 | -57.39 |
| (HIO <sub>3</sub> ) <sub>2</sub> (HIO <sub>2</sub> ) <sub>2</sub> (MSA) <sub>1</sub> | -65.80 | -64.09 | -62.43 | -60.73 |
| (HIO <sub>3</sub> ) <sub>3</sub> (HIO <sub>2</sub> ) <sub>1</sub> (MSA) <sub>1</sub> | -65.83 | -64.10 | -62.42 | -60.71 |

---

**Table S2.** The bond type, electron density  $\rho(r)$  (a.u.), Laplacian electron density  $\nabla^2\rho(r)$  (a.u.), energy density  $H(r)$  at the corresponding bond critical points (BCPs) in the studied HIO<sub>3</sub>-HIO<sub>2</sub>-MSA-based clusters. The orange balls represent BCPs in the AIM theory analysis. HIO<sub>3</sub>, HIO<sub>2</sub>, and MSA are the shorthand for iodic acid, iodosic acid and methanesulfonic acid, respectively. HB (hydrogen bond), XB (halogen bond).

| Cluster                                                                                                                                                                     | Bond    | Bond type | $\rho(r)$ (a.u.) | $\nabla^2\rho(r)$ (a.u.) | $H(r)$ (a.u.) |
|-----------------------------------------------------------------------------------------------------------------------------------------------------------------------------|---------|-----------|------------------|--------------------------|---------------|
| 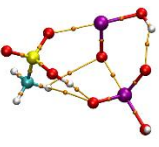<br>(HIO <sub>3</sub> ) <sub>1</sub> (HIO <sub>2</sub> ) <sub>1</sub> (MSA) <sub>1</sub>   | O–H...O | HB        | 0.0691           | 0.1092                   | -0.0248       |
|                                                                                                                                                                             | O–H...O | HB        | 0.0224           | 0.0823                   | 0.0018        |
|                                                                                                                                                                             | O–I...O | XB        | 0.0786           | 0.1509                   | -0.0213       |
|                                                                                                                                                                             | O–I...O | XB        | 0.0405           | 0.1239                   | -0.0016       |
| <br>(HIO <sub>3</sub> ) <sub>1</sub> (HIO <sub>2</sub> ) <sub>1</sub> (MSA) <sub>2</sub>  | O–H...O | HB        | 0.0348           | 0.1086                   | -0.0021       |
|                                                                                                                                                                             | O–H...O | HB        | 0.0090           | 0.0310                   | 0.0009        |
|                                                                                                                                                                             | O–H...O | HB        | 0.0582           | 0.1156                   | -0.0017       |
|                                                                                                                                                                             | O–I...O | XB        | 0.0429           | 0.1257                   | -0.0023       |
|                                                                                                                                                                             | O–I...O | XB        | 0.0476           | 0.1348                   | -0.0034       |
|                                                                                                                                                                             | O–I...O | XB        | 0.0299           | 0.0919                   | 0.0003        |
| <br>(HIO <sub>3</sub> ) <sub>1</sub> (HIO <sub>2</sub> ) <sub>1</sub> (MSA) <sub>3</sub> | O–H...O | HB        | 0.0154           | 0.0620                   | 0.0024        |
|                                                                                                                                                                             | O–H...O | HB        | 0.0521           | 0.1159                   | -0.0128       |
|                                                                                                                                                                             | O–H...O | HB        | 0.0495           | 0.1110                   | -0.0116       |
|                                                                                                                                                                             | O–H...O | HB        | 0.0783           | 0.0943                   | -0.0322       |
|                                                                                                                                                                             | O–I...O | XB        | 0.0114           | 0.0341                   | 0.0006        |
|                                                                                                                                                                             | O–I...O | XB        | 0.0102           | 0.0288                   | 0.0005        |
|                                                                                                                                                                             | O–I...O | XB        | 0.0190           | 0.0675                   | 0.0019        |
|                                                                                                                                                                             | O–I...O | XB        | 0.0431           | 0.1244                   | -0.0025       |
|                                                                                                                                                                             | O–I...O | XB        | 0.0255           | 0.0873                   | 0.0018        |
|                                                                                                                                                                             | O–I...O | XB        | 0.0381           | 0.1035                   | -0.0019       |
| <br>(HIO <sub>3</sub> ) <sub>1</sub> (HIO <sub>2</sub> ) <sub>2</sub> (MSA) <sub>1</sub> | O–H...O | HB        | 0.0644           | 0.1159                   | -0.0206       |
|                                                                                                                                                                             | O–H...O | HB        | 0.0208           | 0.0803                   | -0.0023       |
|                                                                                                                                                                             | O–I...O | XB        | 0.0449           | 0.1262                   | -0.0031       |
|                                                                                                                                                                             | O–I...O | XB        | 0.0119           | 0.0358                   | 0.0009        |

|                                                                                      |         |    |        |        |         |
|--------------------------------------------------------------------------------------|---------|----|--------|--------|---------|
|                                                                                      | O-I...O | XB | 0.0326 | 0.0952 | 0.0001  |
|                                                                                      | O-I...O | XB | 0.0116 | 0.0321 | 0.0004  |
|                                                                                      | O-I...O | XB | 0.0136 | 0.0391 | 0.0005  |
|                                                                                      | O-H...O | HB | 0.0242 | 0.0916 | 0.0018  |
|                                                                                      | O-H...O | HB | 0.0824 | 0.0964 | -0.0349 |
| 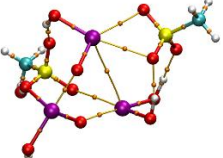    | O-H...O | HB | 0.0383 | 0.1096 | -0.0041 |
| (HIO <sub>3</sub> ) <sub>1</sub> (HIO <sub>2</sub> ) <sub>2</sub> (MSA) <sub>2</sub> | O-H...O | HB | 0.0366 | 0.1111 | -0.0031 |
|                                                                                      | O-I...O | XB | 0.0927 | 0.1744 | -0.0307 |
|                                                                                      | O-I...O | XB | 0.0250 | 0.0745 | 0.0003  |
|                                                                                      | O-I...O | XB | 0.0275 | 0.0784 | -0.0002 |
|                                                                                      | O-I...O | XB | 0.0384 | 0.1231 | -0.0006 |
|                                                                                      | O-I...O | XB | 0.0220 | 0.0724 | 0.0015  |
|                                                                                      | O-H...O | HB | 0.0453 | 0.1116 | -0.0085 |
|                                                                                      | O-H...O | HB | 0.0429 | 0.1091 | -0.0074 |
|   | O-I...O | XB | 0.0247 | 0.0767 | 0.0009  |
| (HIO <sub>3</sub> ) <sub>1</sub> (HIO <sub>2</sub> ) <sub>3</sub> (MSA) <sub>1</sub> | O-I...O | XB | 0.0406 | 0.1109 | -0.0023 |
|                                                                                      | O-I...O | XB | 0.0499 | 0.1345 | -0.0051 |
|                                                                                      | O-I...O | XB | 0.0794 | 0.1637 | -0.0209 |
|                                                                                      | O-I...O | XB | 0.0648 | 0.1555 | -0.0120 |
|                                                                                      | O-I...O | XB | 0.0283 | 0.0906 | 0.0011  |
|                                                                                      | O-H...O | HB | 0.0487 | 0.1180 | -0.0103 |
|                                                                                      | O-H...O | HB | 0.0405 | 0.1131 | -0.0054 |
|   | O-H...O | HB | 0.0869 | 0.0835 | -0.0394 |
| (HIO <sub>3</sub> ) <sub>2</sub> (HIO <sub>2</sub> ) <sub>1</sub> (MSA) <sub>1</sub> | O-H...O | HB | 0.0221 | 0.0793 | 0.0016  |
|                                                                                      | O-I...O | XB | 0.0386 | 0.1171 | -0.0010 |
|                                                                                      | O-I...O | XB | 0.0135 | 0.0422 | 0.0012  |
|                                                                                      | O-I...O | XB | 0.1999 | 0.4607 | -0.1372 |
|                                                                                      | O-H...O | HB | 0.0482 | 0.1163 | -0.0104 |
|   | O-H...O | HB | 0.0268 | 0.1079 | 0.0023  |
|                                                                                      | O-H...O | HB | 0.0627 | 0.1092 | -0.0204 |

|  |         |    |        |        |         |
|--|---------|----|--------|--------|---------|
|  | O-H...O | HB | 0.0586 | 0.1154 | -0.0170 |
|  | O-I...O | XB | 0.0122 | 0.0376 | 0.0009  |
|  | O-I...O | XB | 0.0712 | 0.1462 | -0.0165 |
|  | O-I...O | XB | 0.0178 | 0.0554 | 0.0007  |
|  | O-I...O | XB | 0.0215 | 0.0710 | 0.0008  |
|  | O-I...O | XB | 0.0248 | 0.0802 | 0.0015  |
|  | O-I...O | XB | 0.0607 | 0.1554 | -0.0097 |
|  | O-I...O | XB | 0.0068 | 0.0205 | 0.0007  |
|  | O-H...O | HB | 0.0309 | 0.1010 | -0.0010 |
|  | O-H...O | HB | 0.0696 | 0.1038 | -0.0254 |
|  | O-H...O | HB | 0.0351 | 0.1040 | -0.0029 |
|  | O-I...O | XB | 0.0212 | 0.0675 | 0.0014  |
|  | O-I...O | XB | 0.0911 | 0.1693 | -0.0297 |
|  | O-I...O | XB | 0.0644 | 0.1487 | -0.0122 |
|  | O-I...O | XB | 0.0548 | 0.1427 | -0.0070 |
|  | O-I...O | XB | 0.0621 | 0.1511 | -0.0104 |
|  | O-H...O | HB | 0.0356 | 0.1017 | -0.0032 |
|  | O-H...O | HB | 0.0336 | 0.1016 | -0.0020 |
|  | O-H...O | HB | 0.0542 | 0.1108 | -0.0147 |
|  | O-I...O | XB | 0.0258 | 0.0780 | 0.0010  |
|  | O-I...O | XB | 0.0756 | 0.1668 | -0.0181 |
|  | O-I...O | XB | 0.0152 | 0.0451 | 0.0008  |
|  | O-I...O | XB | 0.0230 | 0.0709 | 0.0010  |
|  | O-I...O | XB | 0.0566 | 0.1467 | -0.0079 |
|  | O-I...O | XB | 0.0811 | 0.1587 | -0.0225 |

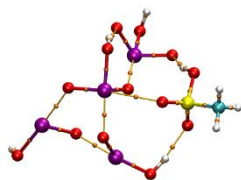

(HIO<sub>3</sub>)<sub>2</sub>(HIO<sub>2</sub>)<sub>2</sub>(MSA)<sub>1</sub>

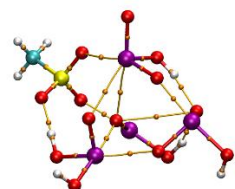

(HIO<sub>3</sub>)<sub>3</sub>(HIO<sub>2</sub>)<sub>1</sub>(MSA)<sub>1</sub>

**Table S3.** Boundary conditions at 268, 278, 288, and 298 K, respectively.

| Temperature (K)                                     | Boundary cluster                                                                     |
|-----------------------------------------------------|--------------------------------------------------------------------------------------|
| 268 K                                               | (HIO <sub>3</sub> ) <sub>6</sub>                                                     |
|                                                     | (HIO <sub>3</sub> ) <sub>5</sub> (MSA) <sub>1</sub>                                  |
|                                                     | (HIO <sub>3</sub> ) <sub>1</sub> (HIO <sub>2</sub> ) <sub>5</sub>                    |
|                                                     | (HIO <sub>2</sub> ) <sub>5</sub> (MSA) <sub>1</sub>                                  |
|                                                     | (HIO <sub>3</sub> ) <sub>2</sub> (HIO <sub>2</sub> ) <sub>4</sub>                    |
|                                                     | (HIO <sub>3</sub> ) <sub>3</sub> (HIO <sub>2</sub> ) <sub>3</sub>                    |
|                                                     | (HIO <sub>2</sub> ) <sub>4</sub> (MSA) <sub>2</sub>                                  |
|                                                     | (HIO <sub>2</sub> ) <sub>3</sub> (MSA) <sub>3</sub>                                  |
|                                                     | (HIO <sub>3</sub> ) <sub>4</sub> (HIO <sub>2</sub> ) <sub>2</sub>                    |
|                                                     | (HIO <sub>3</sub> ) <sub>4</sub> (MSA) <sub>2</sub>                                  |
|                                                     | (HIO <sub>3</sub> ) <sub>3</sub> (MSA) <sub>3</sub>                                  |
|                                                     | (HIO <sub>3</sub> ) <sub>1</sub> (HIO <sub>2</sub> ) <sub>3</sub> (MSA) <sub>2</sub> |
|                                                     | (HIO <sub>3</sub> ) <sub>3</sub> (HIO <sub>2</sub> ) <sub>2</sub> (MSA) <sub>1</sub> |
|                                                     | (HIO <sub>3</sub> ) <sub>3</sub> (HIO <sub>2</sub> ) <sub>1</sub> (MSA) <sub>2</sub> |
|                                                     | (HIO <sub>3</sub> ) <sub>1</sub> (HIO <sub>2</sub> ) <sub>4</sub> (MSA) <sub>1</sub> |
|                                                     | (HIO <sub>3</sub> ) <sub>2</sub> (HIO <sub>2</sub> ) <sub>3</sub> (MSA) <sub>1</sub> |
| 278 K                                               | (HIO <sub>3</sub> ) <sub>6</sub>                                                     |
|                                                     | (HIO <sub>3</sub> ) <sub>5</sub> (MSA) <sub>1</sub>                                  |
|                                                     | (HIO <sub>3</sub> ) <sub>2</sub> (HIO <sub>2</sub> ) <sub>4</sub>                    |
|                                                     | (HIO <sub>3</sub> ) <sub>1</sub> (HIO <sub>2</sub> ) <sub>5</sub>                    |
|                                                     | (HIO <sub>3</sub> ) <sub>3</sub> (HIO <sub>2</sub> ) <sub>3</sub>                    |
|                                                     | (HIO <sub>3</sub> ) <sub>4</sub> (HIO <sub>2</sub> ) <sub>2</sub>                    |
|                                                     | (HIO <sub>3</sub> ) <sub>4</sub> (MSA) <sub>2</sub>                                  |
|                                                     | (HIO <sub>3</sub> ) <sub>3</sub> (MSA) <sub>3</sub>                                  |
|                                                     | (HIO <sub>2</sub> ) <sub>4</sub> (MSA) <sub>2</sub>                                  |
|                                                     | (HIO <sub>2</sub> ) <sub>5</sub> (MSA) <sub>1</sub>                                  |
| (HIO <sub>2</sub> ) <sub>3</sub> (MSA) <sub>3</sub> |                                                                                      |

|       |                                                                                      |
|-------|--------------------------------------------------------------------------------------|
|       | (HIO <sub>3</sub> ) <sub>1</sub> (HIO <sub>2</sub> ) <sub>3</sub> (MSA) <sub>2</sub> |
|       | (HIO <sub>3</sub> ) <sub>3</sub> (HIO <sub>2</sub> ) <sub>1</sub> (MSA) <sub>2</sub> |
|       | (HIO <sub>3</sub> ) <sub>3</sub> (HIO <sub>2</sub> ) <sub>2</sub> (MSA) <sub>1</sub> |
|       | (HIO <sub>3</sub> ) <sub>2</sub> (HIO <sub>2</sub> ) <sub>3</sub> (MSA) <sub>1</sub> |
|       | (HIO <sub>3</sub> ) <sub>1</sub> (HIO <sub>2</sub> ) <sub>4</sub> (MSA) <sub>1</sub> |
|       | (HIO <sub>3</sub> ) <sub>2</sub> (HIO <sub>2</sub> ) <sub>4</sub>                    |
|       | (HIO <sub>3</sub> ) <sub>1</sub> (HIO <sub>2</sub> ) <sub>5</sub>                    |
|       | (HIO <sub>3</sub> ) <sub>3</sub> (HIO <sub>2</sub> ) <sub>3</sub>                    |
|       | (HIO <sub>3</sub> ) <sub>4</sub> (MSA) <sub>2</sub>                                  |
| 288 K | (HIO <sub>3</sub> ) <sub>3</sub> (MSA) <sub>3</sub>                                  |
|       | (HIO <sub>2</sub> ) <sub>3</sub> (MSA) <sub>3</sub>                                  |
|       | (HIO <sub>3</sub> ) <sub>1</sub> (HIO <sub>2</sub> ) <sub>4</sub> (MSA) <sub>1</sub> |
|       | (HIO <sub>3</sub> ) <sub>2</sub> (HIO <sub>2</sub> ) <sub>3</sub> (MSA) <sub>1</sub> |
|       | (HIO <sub>3</sub> ) <sub>1</sub> (HIO <sub>2</sub> ) <sub>3</sub> (MSA) <sub>2</sub> |
|       | (HIO <sub>3</sub> ) <sub>2</sub> (HIO <sub>2</sub> ) <sub>4</sub>                    |
|       | (HIO <sub>3</sub> ) <sub>1</sub> (HIO <sub>2</sub> ) <sub>5</sub>                    |
|       | (HIO <sub>3</sub> ) <sub>3</sub> (HIO <sub>2</sub> ) <sub>3</sub>                    |
|       | (HIO <sub>3</sub> ) <sub>4</sub> (MSA) <sub>2</sub>                                  |
| 298 K | (HIO <sub>3</sub> ) <sub>3</sub> (MSA) <sub>3</sub>                                  |
|       | (HIO <sub>2</sub> ) <sub>3</sub> (MSA) <sub>3</sub>                                  |
|       | (HIO <sub>3</sub> ) <sub>1</sub> (HIO <sub>2</sub> ) <sub>4</sub> (MSA) <sub>1</sub> |
|       | (HIO <sub>3</sub> ) <sub>2</sub> (HIO <sub>2</sub> ) <sub>3</sub> (MSA) <sub>1</sub> |



**Table S4.** The ratios of HIO<sub>3</sub> monomer collision frequencies versus total evaporation rate coefficients ( $\beta C/\Sigma\gamma$ ) at  $T = 268, 278, 288,$  and  $298$  K.  $\beta$  is the rate coefficient of cluster collision with HIO<sub>3</sub> monomer, and  $C$  is the concentration of HIO<sub>3</sub> monomer ( $1.0 \times 10^6$  molecules cm<sup>-3</sup>).

| Clusters                                                          | $\beta C/\Sigma\gamma$ |                        |                        |                        |
|-------------------------------------------------------------------|------------------------|------------------------|------------------------|------------------------|
|                                                                   | 268K                   | 278K                   | 288K                   | 298K                   |
| (HIO <sub>3</sub> ) <sub>2</sub>                                  | $6.08 \times 10^{-7}$  | $1.79 \times 10^{-7}$  | $5.86 \times 10^{-8}$  | $2.10 \times 10^{-8}$  |
| (HIO <sub>3</sub> ) <sub>3</sub>                                  | $2.61 \times 10^{-5}$  | $6.09 \times 10^{-6}$  | $1.60 \times 10^{-6}$  | $4.55 \times 10^{-7}$  |
| (HIO <sub>3</sub> ) <sub>4</sub>                                  | $1.83 \times 10^3$     | $2.15 \times 10^2$     | $3.05 \times 10^1$     | $4.84 \times 10^0$     |
| (HIO <sub>3</sub> ) <sub>5</sub>                                  | $2.86 \times 10^1$     | $3.97 \times 10^0$     | $6.46 \times 10^{-1}$  | $1.22 \times 10^{-1}$  |
| (HIO <sub>2</sub> ) <sub>2</sub>                                  | $4.10 \times 10^1$     | $5.87 \times 10^0$     | $9.81 \times 10^{-1}$  | $1.85 \times 10^{-1}$  |
| (HIO <sub>2</sub> ) <sub>3</sub>                                  | $1.86 \times 10^4$     | $2.89 \times 10^3$     | $2.59 \times 10^2$     | $3.77 \times 10^1$     |
| (HIO <sub>2</sub> ) <sub>4</sub>                                  | $1.30 \times 10^1$     | $1.10 \times 10^2$     | $2.33 \times 10^1$     | $3.80 \times 10^0$     |
| (HIO <sub>2</sub> ) <sub>5</sub>                                  | $9.54 \times 10^0$     | $1.41 \times 10^0$     | $2.37 \times 10^{-1}$  | $6.16 \times 10^{-2}$  |
| (MSA) <sub>2</sub>                                                | $1.21 \times 10^{-4}$  | $2.83 \times 10^{-5}$  | $7.31 \times 10^{-6}$  | $2.07 \times 10^{-6}$  |
| (MSA) <sub>3</sub>                                                | $9.92 \times 10^{-10}$ | $3.57 \times 10^{-10}$ | $1.40 \times 10^{-10}$ | $5.87 \times 10^{-11}$ |
| (HIO <sub>3</sub> ) <sub>1</sub> (HIO <sub>2</sub> ) <sub>1</sub> | $1.98 \times 10^1$     | $2.83 \times 10^0$     | $4.70 \times 10^{-1}$  | $8.68 \times 10^{-2}$  |
| (HIO <sub>3</sub> ) <sub>1</sub> (HIO <sub>2</sub> ) <sub>2</sub> | $3.45 \times 10^4$     | $3.59 \times 10^3$     | $4.45 \times 10^2$     | $6.44 \times 10^1$     |
| (HIO <sub>3</sub> ) <sub>1</sub> (HIO <sub>2</sub> ) <sub>3</sub> | $2.82 \times 10^{-1}$  | $4.27 \times 10^{-2}$  | $8.71 \times 10^{-3}$  | $1.83 \times 10^{-3}$  |
| (HIO <sub>3</sub> ) <sub>1</sub> (HIO <sub>2</sub> ) <sub>4</sub> | $9.20 \times 10^4$     | $8.90 \times 10^3$     | $1.03 \times 10^3$     | $1.40 \times 10^2$     |
| (HIO <sub>3</sub> ) <sub>2</sub> (HIO <sub>2</sub> ) <sub>1</sub> | $1.33 \times 10^{-3}$  | $2.61 \times 10^{-4}$  | $5.92 \times 10^{-5}$  | $1.46 \times 10^{-5}$  |
| (HIO <sub>3</sub> ) <sub>2</sub> (HIO <sub>2</sub> ) <sub>2</sub> | $3.03 \times 10^{-1}$  | $5.34 \times 10^{-2}$  | $1.08 \times 10^{-2}$  | $2.36 \times 10^{-3}$  |
| (HIO <sub>3</sub> ) <sub>2</sub> (HIO <sub>2</sub> ) <sub>3</sub> | $4.78 \times 10^5$     | $4.41 \times 10^4$     | $4.93 \times 10^3$     | $6.34 \times 10^2$     |
| (HIO <sub>3</sub> ) <sub>3</sub> (HIO <sub>2</sub> ) <sub>1</sub> | $1.67 \times 10^4$     | $1.95 \times 10^3$     | $2.65 \times 10^2$     | $4.19 \times 10^1$     |
| (HIO <sub>3</sub> ) <sub>3</sub> (HIO <sub>2</sub> ) <sub>2</sub> | $2.24 \times 10^1$     | $2.87 \times 10^0$     | $4.47 \times 10^{-1}$  | $8.00 \times 10^{-2}$  |
| (HIO <sub>3</sub> ) <sub>4</sub> (HIO <sub>2</sub> ) <sub>1</sub> | $2.19 \times 10^{-3}$  | $4.73 \times 10^{-4}$  | $1.06 \times 10^{-4}$  | $2.67 \times 10^{-5}$  |
| (HIO <sub>3</sub> ) <sub>1</sub> (MSA) <sub>1</sub>               | $6.08 \times 10^{-5}$  | $1.39 \times 10^{-5}$  | $3.63 \times 10^{-6}$  | $1.04 \times 10^{-6}$  |
| (HIO <sub>3</sub> ) <sub>1</sub> (MSA) <sub>2</sub>               | $3.63 \times 10^{-7}$  | $1.01 \times 10^{-7}$  | $3.14 \times 10^{-8}$  | $1.05 \times 10^{-8}$  |
| (HIO <sub>3</sub> ) <sub>1</sub> (MSA) <sub>3</sub>               | $1.33 \times 10^{-1}$  | $2.11 \times 10^{-2}$  | $3.87 \times 10^{-3}$  | $7.83 \times 10^{-4}$  |
| (HIO <sub>3</sub> ) <sub>2</sub> (MSA) <sub>1</sub>               | $6.50 \times 10^{-6}$  | $1.65 \times 10^{-6}$  | $4.63 \times 10^{-7}$  | $4.24 \times 10^{-10}$ |
| (HIO <sub>3</sub> ) <sub>2</sub> (MSA) <sub>2</sub>               | $4.98 \times 10^{-5}$  | $1.07 \times 10^{-5}$  | $2.67 \times 10^{-6}$  | $7.33 \times 10^{-6}$  |

|                                                  |                       |                       |                       |                       |
|--------------------------------------------------|-----------------------|-----------------------|-----------------------|-----------------------|
| $(\text{HIO}_3)_2(\text{MSA})_3$                 | $8.22 \times 10^{-4}$ | $1.89 \times 10^{-4}$ | $4.88 \times 10^{-5}$ | $1.40 \times 10^{-5}$ |
| $(\text{HIO}_3)_3(\text{MSA})_1$                 | $1.09 \times 10^{-4}$ | $2.70 \times 10^{-5}$ | $7.48 \times 10^{-6}$ | $1.12 \times 10^{-4}$ |
| $(\text{HIO}_3)_3(\text{MSA})_2$                 | $6.03 \times 10^2$    | $7.36 \times 10^1$    | $1.05 \times 10^1$    | $1.71 \times 10^0$    |
| $(\text{HIO}_3)_4(\text{MSA})_1$                 | $4.20 \times 10^{-1}$ | $6.46 \times 10^{-2}$ | $1.13 \times 10^{-2}$ | $2.22 \times 10^{-3}$ |
| $(\text{HIO}_2)_1(\text{MSA})_1$                 | $3.11 \times 10^0$    | $4.63 \times 10^{-1}$ | $8.17 \times 10^{-2}$ | $1.59 \times 10^{-2}$ |
| $(\text{HIO}_2)_1(\text{MSA})_2$                 | $1.59 \times 10^{-3}$ | $3.36 \times 10^{-4}$ | $7.91 \times 10^{-5}$ | $2.06 \times 10^{-5}$ |
| $(\text{HIO}_2)_1(\text{MSA})_3$                 | $4.75 \times 10^{-5}$ | $1.10 \times 10^{-5}$ | $2.86 \times 10^{-6}$ | $8.15 \times 10^{-7}$ |
| $(\text{HIO}_2)_2(\text{MSA})_1$                 | $1.41 \times 10^1$    | $2.03 \times 10^0$    | $3.35 \times 10^{-1}$ | $6.25 \times 10^{-2}$ |
| $(\text{HIO}_2)_2(\text{MSA})_2$                 | $7.94 \times 10^4$    | $7.66 \times 10^3$    | $9.17 \times 10^2$    | $1.23 \times 10^2$    |
| $(\text{HIO}_2)_2(\text{MSA})_3$                 | $2.68 \times 10^{-1}$ | $4.56 \times 10^{-2}$ | $9.13 \times 10^{-3}$ | $1.82 \times 10^{-3}$ |
| $(\text{HIO}_2)_3(\text{MSA})_1$                 | $6.65 \times 10^2$    | $5.91 \times 10^1$    | $1.30 \times 10^1$    | $2.25 \times 10^0$    |
| $(\text{HIO}_2)_3(\text{MSA})_2$                 | $2.49 \times 10^2$    | $3.27 \times 10^1$    | $4.95 \times 10^0$    | $1.11 \times 10^0$    |
| $(\text{HIO}_2)_4(\text{MSA})_1$                 | $8.33 \times 10^0$    | $1.20 \times 10^0$    | $1.97 \times 10^{-1}$ | $7.22 \times 10^{-2}$ |
| $(\text{HIO}_3)_1(\text{HIO}_2)_1(\text{MSA})_1$ | $1.79 \times 10^{-4}$ | $3.76 \times 10^{-5}$ | $9.10 \times 10^{-6}$ | $2.39 \times 10^{-6}$ |
| $(\text{HIO}_3)_1(\text{HIO}_2)_1(\text{MSA})_2$ | $6.18 \times 10^{-2}$ | $1.09 \times 10^{-2}$ | $2.22 \times 10^{-3}$ | $5.08 \times 10^{-4}$ |
| $(\text{HIO}_3)_1(\text{HIO}_2)_1(\text{MSA})_3$ | $5.43 \times 10^{-2}$ | $9.21 \times 10^{-3}$ | $1.77 \times 10^{-3}$ | $3.80 \times 10^{-4}$ |
| $(\text{HIO}_3)_1(\text{HIO}_2)_2(\text{MSA})_1$ | $4.30 \times 10^{-6}$ | $1.19 \times 10^{-6}$ | $3.64 \times 10^{-7}$ | $1.21 \times 10^{-7}$ |
| $(\text{HIO}_3)_1(\text{HIO}_2)_2(\text{MSA})_2$ | $9.18 \times 10^{-4}$ | $2.06 \times 10^{-4}$ | $5.25 \times 10^{-5}$ | $1.46 \times 10^{-5}$ |
| $(\text{HIO}_3)_1(\text{HIO}_2)_3(\text{MSA})_1$ | $2.77 \times 10^0$    | $4.12 \times 10^{-1}$ | $6.98 \times 10^{-2}$ | $1.34 \times 10^{-2}$ |
| $(\text{HIO}_3)_2(\text{HIO}_2)_1(\text{MSA})_1$ | $4.83 \times 10^{-2}$ | $8.40 \times 10^{-3}$ | $1.65 \times 10^{-3}$ | $3.75 \times 10^{-4}$ |
| $(\text{HIO}_3)_2(\text{HIO}_2)_1(\text{MSA})_2$ | $2.46 \times 10^{-1}$ | $4.16 \times 10^{-2}$ | $8.05 \times 10^{-3}$ | $1.74 \times 10^{-3}$ |
| $(\text{HIO}_3)_2(\text{HIO}_2)_2(\text{MSA})_1$ | $1.35 \times 10^{-6}$ | $3.20 \times 10^{-7}$ | $8.53 \times 10^{-8}$ | $2.59 \times 10^{-8}$ |
| $(\text{HIO}_3)_3(\text{HIO}_2)_1(\text{MSA})_1$ | $1.02 \times 10^{-3}$ | $1.86 \times 10^{-4}$ | $3.94 \times 10^{-5}$ | $9.29 \times 10^{-6}$ |

**Table S5.** The evaporation rate coefficients ( $\gamma$ ,  $\text{s}^{-1}$ ) for all evaporation pathways of clusters at 278 K.

| Evaporation pathways                                                                           | Evaporation rate coefficients ( $\gamma$ , $\text{s}^{-1}$ ) |
|------------------------------------------------------------------------------------------------|--------------------------------------------------------------|
| $(\text{HIO}_3)_2 \rightarrow \text{HIO}_3 + \text{HIO}_3$                                     | $1.48 \times 10^3$                                           |
| $(\text{HIO}_3)_3 \rightarrow (\text{HIO}_3)_2 + \text{HIO}_3$                                 | $4.76 \times 10^1$                                           |
| $(\text{HIO}_3)_4 \rightarrow (\text{HIO}_3)_3 + \text{HIO}_3$                                 | $1.45 \times 10^{-6}$                                        |
| $(\text{HIO}_3)_5 \rightarrow (\text{HIO}_3)_4 + \text{HIO}_3$                                 | $8.37 \times 10^{-5}$                                        |
| $(\text{HIO}_2)_2 \rightarrow \text{HIO}_2 + \text{HIO}_2$                                     | $4.40 \times 10^{-5}$                                        |
| $(\text{HIO}_2)_3 \rightarrow (\text{HIO}_2)_2 + \text{HIO}_2$                                 | $9.68 \times 10^{-8}$                                        |
| $(\text{HIO}_2)_4 \rightarrow (\text{HIO}_2)_3 + \text{HIO}_2$                                 | $2.75 \times 10^{-6}$                                        |
| $(\text{HIO}_2)_5 \rightarrow (\text{HIO}_2)_4 + \text{HIO}_2$                                 | $2.29 \times 10^{-4}$                                        |
| $(\text{MSA})_2 \rightarrow \text{MSA} + \text{MSA}$                                           | $1.11 \times 10^1$                                           |
| $(\text{MSA})_3 \rightarrow (\text{MSA})_2 + \text{MSA}$                                       | $9.46 \times 10^5$                                           |
| $(\text{HIO}_3)_1(\text{HIO}_2)_1 \rightarrow \text{HIO}_3 + \text{HIO}_2$                     | $9.30 \times 10^{-5}$                                        |
| $(\text{HIO}_3)_1(\text{HIO}_2)_2 \rightarrow \text{HIO}_3 + (\text{HIO}_2)_2$                 | $2.68 \times 10^{-8}$                                        |
| $(\text{HIO}_3)_1(\text{HIO}_2)_2 \rightarrow (\text{HIO}_3)_1(\text{HIO}_2)_1 + \text{HIO}_2$ | $5.24 \times 10^{-8}$                                        |
| $(\text{HIO}_3)_1(\text{HIO}_2)_3 \rightarrow \text{HIO}_3 + (\text{HIO}_2)_3$                 | $1.52 \times 10^{-3}$                                        |
| $(\text{HIO}_3)_1(\text{HIO}_2)_3 \rightarrow (\text{HIO}_3)_1(\text{HIO}_2)_2 + \text{HIO}_2$ | $5.59 \times 10^{-3}$                                        |
| $(\text{HIO}_3)_1(\text{HIO}_2)_4 \rightarrow \text{HIO}_3 + (\text{HIO}_2)_4$                 | $3.62 \times 10^{-8}$                                        |
| $(\text{HIO}_3)_1(\text{HIO}_2)_4 \rightarrow (\text{HIO}_3)_1(\text{HIO}_2)_3 + \text{HIO}_2$ | $6.64 \times 10^{-11}$                                       |
| $(\text{HIO}_3)_2(\text{HIO}_2)_1 \rightarrow \text{HIO}_3 + (\text{HIO}_3)_1(\text{HIO}_2)_1$ | $1.09 \times 10^0$                                           |
| $(\text{HIO}_3)_2(\text{HIO}_2)_1 \rightarrow (\text{HIO}_3)_2 + \text{HIO}_2$                 | $1.75 \times 10^{-8}$                                        |
| $(\text{HIO}_3)_2(\text{HIO}_2)_2 \rightarrow \text{HIO}_3 + (\text{HIO}_3)_1(\text{HIO}_2)_2$ | $5.77 \times 10^{-3}$                                        |
| $(\text{HIO}_3)_2(\text{HIO}_2)_2 \rightarrow (\text{HIO}_3)_2(\text{HIO}_2)_1 + \text{HIO}_2$ | $2.79 \times 10^{-10}$                                       |
| $(\text{HIO}_3)_2(\text{HIO}_2)_3 \rightarrow \text{HIO}_3 + (\text{HIO}_3)_1(\text{HIO}_2)_3$ | $3.73 \times 10^{-9}$                                        |
| $(\text{HIO}_3)_2(\text{HIO}_2)_3 \rightarrow (\text{HIO}_3)_2(\text{HIO}_2)_2 + \text{HIO}_2$ | $3.68 \times 10^{-9}$                                        |
| $(\text{HIO}_3)_3(\text{HIO}_2)_1 \rightarrow \text{HIO}_3 + (\text{HIO}_3)_2(\text{HIO}_2)_1$ | $1.59 \times 10^{-7}$                                        |
| $(\text{HIO}_3)_3(\text{HIO}_2)_1 \rightarrow (\text{HIO}_3)_3 + \text{HIO}_2$                 | $6.01 \times 10^{-17}$                                       |
| $(\text{HIO}_3)_3(\text{HIO}_2)_2 \rightarrow \text{HIO}_3 + (\text{HIO}_3)_2(\text{HIO}_2)_2$ | $1.14 \times 10^{-4}$                                        |
| $(\text{HIO}_3)_3(\text{HIO}_2)_2 \rightarrow (\text{HIO}_3)_3(\text{HIO}_2)_1 + \text{HIO}_2$ | $2.03 \times 10^{-7}$                                        |

|                                                                                                |                        |
|------------------------------------------------------------------------------------------------|------------------------|
| $(\text{HIO}_3)_4(\text{HIO}_2)_1 \rightarrow \text{HIO}_3 + (\text{HIO}_3)_3(\text{HIO}_2)_1$ | $6.98 \times 10^{-1}$  |
| $(\text{HIO}_3)_4(\text{HIO}_2)_1 \rightarrow (\text{HIO}_3)_4 + \text{HIO}_2$                 | $2.92 \times 10^{-11}$ |
| $(\text{HIO}_3)_1(\text{MSA})_1 \rightarrow \text{HIO}_3 + \text{MSA}$                         | $1.03 \times 10^1$     |
| $(\text{HIO}_3)_1(\text{MSA})_2 \rightarrow \text{HIO}_3 + (\text{MSA})_2$                     | $1.00 \times 10^3$     |
| $(\text{HIO}_3)_1(\text{MSA})_2 \rightarrow (\text{HIO}_3)_1(\text{MSA})_1 + \text{MSA}$       | $2.12 \times 10^3$     |
| $(\text{HIO}_3)_1(\text{MSA})_3 \rightarrow \text{HIO}_3 + (\text{MSA})_3$                     | $1.74 \times 10^{-5}$  |
| $(\text{HIO}_3)_1(\text{MSA})_3 \rightarrow (\text{HIO}_3)_1(\text{MSA})_2 + \text{MSA}$       | $1.61 \times 10^{-2}$  |
| $(\text{HIO}_3)_2(\text{MSA})_1 \rightarrow \text{HIO}_3 + (\text{HIO}_3)_1(\text{MSA})_1$     | $1.82 \times 10^2$     |
| $(\text{HIO}_3)_2(\text{MSA})_1 \rightarrow (\text{HIO}_3)_2 + \text{MSA}$                     | $6.13 \times 10^{-1}$  |
| $(\text{HIO}_3)_2(\text{MSA})_2 \rightarrow \text{HIO}_3 + (\text{HIO}_3)_1(\text{MSA})_2$     | $2.48 \times 10^0$     |
| $(\text{HIO}_3)_2(\text{MSA})_2 \rightarrow (\text{HIO}_3)_2(\text{MSA})_1 + \text{MSA}$       | $2.83 \times 10^1$     |
| $(\text{HIO}_3)_2(\text{MSA})_3 \rightarrow \text{HIO}_3 + (\text{HIO}_3)_1(\text{MSA})_3$     | $1.88 \times 10^0$     |
| $(\text{HIO}_3)_2(\text{MSA})_3 \rightarrow (\text{HIO}_3)_2(\text{MSA})_2 + \text{MSA}$       | $1.21 \times 10^{-2}$  |
| $(\text{HIO}_3)_3(\text{MSA})_1 \rightarrow \text{HIO}_3 + (\text{HIO}_3)_2(\text{MSA})_1$     | $1.18 \times 10^1$     |
| $(\text{HIO}_3)_3(\text{MSA})_1 \rightarrow (\text{HIO}_3)_3 + \text{MSA}$                     | $1.49 \times 10^{-1}$  |
| $(\text{HIO}_3)_3(\text{MSA})_2 \rightarrow \text{HIO}_3 + (\text{HIO}_3)_2(\text{MSA})_2$     | $1.40 \times 10^{-6}$  |
| $(\text{HIO}_3)_3(\text{MSA})_2 \rightarrow (\text{HIO}_3)_3(\text{MSA})_1 + \text{MSA}$       | $3.33 \times 10^{-6}$  |
| $(\text{HIO}_3)_4(\text{MSA})_1 \rightarrow \text{HIO}_3 + (\text{HIO}_3)_3(\text{MSA})_1$     | $5.28 \times 10^{-8}$  |
| $(\text{HIO}_3)_4(\text{MSA})_1 \rightarrow (\text{HIO}_3)_4 + \text{MSA}$                     | $5.32 \times 10^{-3}$  |
| $(\text{HIO}_2)_1(\text{MSA})_1 \rightarrow \text{HIO}_2 + \text{MSA}$                         | $3.05 \times 10^{-4}$  |
| $(\text{HIO}_2)_1(\text{MSA})_2 \rightarrow \text{HIO}_2 + (\text{MSA})_2$                     | $1.35 \times 10^{-5}$  |
| $(\text{HIO}_2)_1(\text{MSA})_2 \rightarrow (\text{HIO}_2)_1(\text{MSA})_1 + \text{MSA}$       | $9.35 \times 10^{-1}$  |
| $(\text{HIO}_2)_1(\text{MSA})_3 \rightarrow \text{HIO}_2 + (\text{MSA})_3$                     | $4.63 \times 10^{-10}$ |
| $(\text{HIO}_2)_1(\text{MSA})_3 \rightarrow (\text{HIO}_2)_1(\text{MSA})_2 + \text{MSA}$       | $3.13 \times 10^1$     |
| $(\text{HIO}_3)_2(\text{MSA})_1 \rightarrow \text{HIO}_2 + (\text{HIO}_2)_1(\text{MSA})_1$     | $3.40 \times 10^{-5}$  |
| $(\text{HIO}_2)_2(\text{MSA})_1 \rightarrow (\text{HIO}_2)_2 + \text{MSA}$                     | $1.12 \times 10^{-4}$  |
| $(\text{HIO}_2)_2(\text{MSA})_2 \rightarrow \text{HIO}_2 + (\text{HIO}_2)_1(\text{MSA})_2$     | $1.61 \times 10^{-12}$ |
| $(\text{HIO}_2)_2(\text{MSA})_2 \rightarrow (\text{HIO}_2)_2(\text{MSA})_1 + \text{MSA}$       | $4.26 \times 10^{-8}$  |
| $(\text{HIO}_2)_2(\text{MSA})_3 \rightarrow \text{HIO}_2 + (\text{HIO}_2)_1(\text{MSA})_3$     | $4.12 \times 10^{-16}$ |
| $(\text{HIO}_2)_2(\text{MSA})_3 \rightarrow (\text{HIO}_2)_2(\text{MSA})_2 + \text{MSA}$       | $7.73 \times 10^{-3}$  |

|                                                                                                                            |                        |
|----------------------------------------------------------------------------------------------------------------------------|------------------------|
| $(\text{HIO}_2)_3(\text{MSA})_1 \rightarrow \text{HIO}_2 + (\text{HIO}_2)_2(\text{MSA})_1$                                 | $4.78 \times 10^{-9}$  |
| $(\text{HIO}_2)_3(\text{MSA})_1 \rightarrow (\text{HIO}_2)_3 + \text{MSA}$                                                 | $5.30 \times 10^{-6}$  |
| $(\text{HIO}_2)_3(\text{MSA})_2 \rightarrow \text{HIO}_2 + (\text{HIO}_2)_2(\text{MSA})_2$                                 | $1.08 \times 10^{-6}$  |
| $(\text{HIO}_2)_3(\text{MSA})_2 \rightarrow (\text{HIO}_2)_3(\text{MSA})_1 + \text{MSA}$                                   | $9.38 \times 10^{-6}$  |
| $(\text{HIO}_2)_4(\text{MSA})_1 \rightarrow \text{HIO}_2 + (\text{HIO}_2)_3(\text{MSA})_1$                                 | $9.62 \times 10^{-5}$  |
| $(\text{HIO}_2)_4(\text{MSA})_1 \rightarrow (\text{HIO}_2)_4 + \text{MSA}$                                                 | $1.80 \times 10^{-4}$  |
| $(\text{HIO}_3)_1(\text{HIO}_2)_1(\text{MSA})_1 \rightarrow \text{HIO}_3 + (\text{HIO}_2)_1(\text{MSA})_1$                 | $1.07 \times 10^0$     |
| $(\text{HIO}_3)_1(\text{HIO}_2)_1(\text{MSA})_1 \rightarrow \text{HIO}_2 + (\text{HIO}_3)_1(\text{MSA})_1$                 | $3.26 \times 10^{-5}$  |
| $(\text{HIO}_3)_1(\text{HIO}_2)_1(\text{MSA})_1 \rightarrow \text{MSA} + (\text{HIO}_3)_1(\text{HIO}_2)_1$                 | $6.86 \times 10^0$     |
| $(\text{HIO}_3)_1(\text{HIO}_2)_1(\text{MSA})_2 \rightarrow \text{HIO}_3 + (\text{HIO}_2)_1(\text{MSA})_2$                 | $1.63 \times 10^{-2}$  |
| $(\text{HIO}_3)_1(\text{HIO}_2)_1(\text{MSA})_2 \rightarrow \text{HIO}_2 + (\text{HIO}_3)_1(\text{MSA})_2$                 | $2.23 \times 10^{-10}$ |
| $(\text{HIO}_3)_1(\text{HIO}_2)_1(\text{MSA})_2 \rightarrow \text{MSA} + (\text{HIO}_3)_1(\text{HIO}_2)_1(\text{MSA})_1$   | $1.39 \times 10^{-2}$  |
| $(\text{HIO}_3)_1(\text{HIO}_2)_1(\text{MSA})_3 \rightarrow \text{HIO}_3 + (\text{HIO}_2)_1(\text{MSA})_3$                 | $2.08 \times 10^{-5}$  |
| $(\text{HIO}_3)_1(\text{HIO}_2)_1(\text{MSA})_3 \rightarrow \text{HIO}_2 + (\text{HIO}_3)_1(\text{MSA})_3$                 | $5.52 \times 10^{-10}$ |
| $(\text{HIO}_3)_1(\text{HIO}_2)_1(\text{MSA})_3 \rightarrow \text{MSA} + (\text{HIO}_3)_1(\text{HIO}_2)_1(\text{MSA})_2$   | $3.91 \times 10^{-2}$  |
| $(\text{HIO}_3)_1(\text{HIO}_2)_2(\text{MSA})_1 \rightarrow \text{HIO}_3 + (\text{HIO}_2)_2(\text{MSA})_1$                 | $6.55 \times 10^{-2}$  |
| $(\text{HIO}_3)_1(\text{HIO}_2)_2(\text{MSA})_1 \rightarrow \text{HIO}_2 + (\text{HIO}_3)_1(\text{HIO}_2)_1(\text{MSA})_1$ | $2.11 \times 10^{-6}$  |
| $(\text{HIO}_3)_1(\text{HIO}_2)_2(\text{MSA})_1 \rightarrow \text{MSA} + (\text{HIO}_3)_1(\text{HIO}_2)_2$                 | $2.67 \times 10^2$     |
| $(\text{HIO}_3)_1(\text{HIO}_2)_2(\text{MSA})_2 \rightarrow \text{HIO}_3 + (\text{HIO}_2)_2(\text{MSA})_2$                 | $1.68 \times 10^0$     |
| $(\text{HIO}_3)_1(\text{HIO}_2)_2(\text{MSA})_2 \rightarrow \text{HIO}_2 + (\text{HIO}_3)_1(\text{HIO}_2)_1(\text{MSA})_2$ | $1.68 \times 10^{-10}$ |
| $(\text{HIO}_3)_1(\text{HIO}_2)_2(\text{MSA})_2 \rightarrow \text{MSA} + (\text{HIO}_3)_1(\text{HIO}_2)_2(\text{MSA})_1$   | $1.08 \times 10^{-6}$  |
| $(\text{HIO}_3)_1(\text{HIO}_2)_3(\text{MSA})_1 \rightarrow \text{HIO}_3 + (\text{HIO}_2)_3(\text{MSA})_1$                 | $8.08 \times 10^{-4}$  |
| $(\text{HIO}_3)_1(\text{HIO}_2)_3(\text{MSA})_1 \rightarrow \text{HIO}_2 + (\text{HIO}_3)_1(\text{HIO}_2)_2(\text{MSA})_1$ | $5.99 \times 10^{-11}$ |
| $(\text{HIO}_3)_1(\text{HIO}_2)_3(\text{MSA})_1 \rightarrow \text{MSA} + (\text{HIO}_3)_1(\text{HIO}_2)_3$                 | $2.77 \times 10^{-6}$  |
| $(\text{HIO}_3)_2(\text{HIO}_2)_1(\text{MSA})_1 \rightarrow \text{HIO}_3 + (\text{HIO}_3)_1(\text{HIO}_2)_1(\text{MSA})_1$ | $5.32 \times 10^{-3}$  |
| $(\text{HIO}_3)_2(\text{HIO}_2)_1(\text{MSA})_1 \rightarrow \text{HIO}_2 + (\text{HIO}_3)_2(\text{MSA})_1$                 | $9.73 \times 10^{-10}$ |
| $(\text{HIO}_3)_2(\text{HIO}_2)_1(\text{MSA})_1 \rightarrow \text{MSA} + (\text{HIO}_3)_2(\text{HIO}_2)_1$                 | $3.26 \times 10^{-2}$  |
| $(\text{HIO}_3)_2(\text{HIO}_2)_1(\text{MSA})_2 \rightarrow \text{HIO}_3 + (\text{HIO}_3)_1(\text{HIO}_2)_1(\text{MSA})_2$ | $2.34 \times 10^{-3}$  |
| $(\text{HIO}_3)_2(\text{HIO}_2)_1(\text{MSA})_2 \rightarrow \text{HIO}_2 + (\text{HIO}_3)_2(\text{MSA})_2$                 | $2.12 \times 10^{-13}$ |
| $(\text{HIO}_3)_2(\text{HIO}_2)_1(\text{MSA})_2 \rightarrow \text{MSA} + (\text{HIO}_3)_2(\text{HIO}_2)_1(\text{MSA})_1$   | $6.02 \times 10^{-3}$  |

|                                                                                                                            |                        |
|----------------------------------------------------------------------------------------------------------------------------|------------------------|
| $(\text{HIO}_3)_2(\text{HIO}_2)_2(\text{MSA})_1 \rightarrow \text{HIO}_3 + (\text{HIO}_3)_1(\text{HIO}_2)_2(\text{MSA})_1$ | $2.33 \times 10^{-2}$  |
| $(\text{HIO}_3)_2(\text{HIO}_2)_2(\text{MSA})_1 \rightarrow \text{HIO}_2 + (\text{HIO}_3)_2(\text{HIO}_2)_1(\text{MSA})_1$ | $9.31 \times 10^{-6}$  |
| $(\text{HIO}_3)_2(\text{HIO}_2)_2(\text{MSA})_1 \rightarrow \text{MSA} + (\text{HIO}_3)_2(\text{HIO}_2)_2$                 | $1.06 \times 10^3$     |
| $(\text{HIO}_3)_3(\text{HIO}_2)_1(\text{MSA})_1 \rightarrow \text{HIO}_3 + (\text{HIO}_3)_2(\text{HIO}_2)_1(\text{MSA})_1$ | $9.06 \times 10^{-6}$  |
| $(\text{HIO}_3)_3(\text{HIO}_2)_1(\text{MSA})_1 \rightarrow \text{HIO}_2 + (\text{HIO}_3)_3(\text{MSA})_1$                 | $7.06 \times 10^{-16}$ |
| $(\text{HIO}_3)_3(\text{HIO}_2)_1(\text{MSA})_1 \rightarrow \text{MSA} + (\text{HIO}_3)_3(\text{HIO}_2)_1$                 | $1.83 \times 10^0$     |

---

**Table S6.** Cartesian coordinates of all clusters in the present study at the  $\omega$ B97X-D/6-311++G(3df,3pd) + aug-cc-pVTZ-PP with ECP28MDF (for I) level of theory.

**(HIO<sub>3</sub>)<sub>1</sub>(HIO<sub>2</sub>)<sub>1</sub>(MSA)<sub>1</sub>:**

| Atoms | X         | Y         | Z         |
|-------|-----------|-----------|-----------|
| I     | -1.877771 | -0.752509 | 0.232491  |
| O     | -0.595483 | -1.823796 | -0.441557 |
| O     | -2.129309 | 0.529646  | -0.990503 |
| O     | -3.347446 | -1.887376 | -0.363133 |
| H     | -3.316493 | -2.009666 | -1.318151 |
| I     | 0.538518  | 1.786822  | -0.007683 |
| O     | -0.280369 | 0.538764  | 1.127138  |
| O     | -0.982028 | 2.977162  | -0.164915 |
| H     | -1.650294 | 2.452812  | -0.639218 |
| C     | 2.381400  | -2.002110 | 1.293918  |
| H     | 1.349560  | -1.779093 | 1.553529  |
| H     | 3.055380  | -1.690334 | 2.087356  |
| H     | 2.513617  | -3.055293 | 1.064019  |
| S     | 2.803335  | -1.068186 | -0.135331 |
| O     | 4.109943  | -1.391523 | -0.576780 |
| O     | 2.557737  | 0.329273  | 0.190156  |
| O     | 1.799377  | -1.531930 | -1.201161 |
| H     | 0.827546  | -1.555140 | -0.894535 |

**(HIO<sub>3</sub>)<sub>1</sub>(HIO<sub>2</sub>)<sub>1</sub>(MSA)<sub>2</sub>:**

| Atoms | X         | Y         | Z         |
|-------|-----------|-----------|-----------|
| I     | 2.409779  | 0.774129  | -0.040206 |
| O     | 1.385502  | 0.576253  | 1.430168  |
| O     | 1.373911  | 1.601378  | -1.214087 |
| O     | 3.392857  | 2.316656  | 0.600986  |
| H     | 2.789785  | 3.054133  | 0.751657  |
| I     | -0.952983 | -0.240914 | 1.639934  |
| O     | -0.192173 | -1.842568 | 2.353516  |
| O     | -2.791548 | -0.834672 | 1.828123  |
| H     | -3.101196 | -1.123232 | 0.961065  |
| C     | -1.635090 | 1.941809  | -2.395478 |
| H     | -1.580410 | 3.023401  | -2.301298 |
| H     | -2.078867 | 1.657620  | -3.345129 |
| H     | -0.648400 | 1.503914  | -2.254014 |
| S     | -2.689253 | 1.381700  | -1.107970 |
| O     | -4.018312 | 1.835580  | -1.303795 |

|   |           |           |           |
|---|-----------|-----------|-----------|
| O | -2.052011 | 1.693605  | 0.151464  |
| O | -2.703961 | -0.170078 | -1.294340 |
| H | -1.806699 | -0.574127 | -1.495560 |
| C | 1.026057  | -3.296909 | -2.467723 |
| H | 1.757678  | -3.951230 | -2.002419 |
| H | 1.462361  | -2.757735 | -3.303648 |
| H | 0.154792  | -3.862035 | -2.787581 |
| S | 0.493560  | -2.124785 | -1.266745 |
| O | -0.450874 | -1.245829 | -1.942264 |
| O | 1.721432  | -1.408995 | -0.868687 |
| O | -0.082162 | -2.871797 | -0.166188 |
| H | -0.035276 | -2.407404 | 1.566781  |

**(HIO<sub>3</sub>)<sub>1</sub>(HIO<sub>2</sub>)<sub>1</sub>(MSA)<sub>3</sub>:**

| Atoms | X         | Y         | Z         |
|-------|-----------|-----------|-----------|
| I     | -0.704502 | 1.880683  | -0.087693 |
| O     | -0.262147 | 0.962564  | -1.568210 |
| O     | 0.769896  | 2.880001  | 0.140275  |
| O     | -1.718617 | 3.284402  | -0.904918 |
| H     | -2.597548 | 2.909382  | -1.066314 |
| I     | 0.237573  | -1.482650 | -1.552860 |
| O     | -1.493460 | -1.862291 | -2.239184 |
| O     | 0.793149  | -3.313365 | -1.239210 |
| H     | 0.691830  | -3.449932 | -0.285722 |
| C     | -5.131422 | -0.202325 | 0.675597  |
| H     | -5.602298 | -0.293691 | -0.299047 |
| H     | -5.397670 | 0.738529  | 1.148982  |
| H     | -5.404847 | -1.040327 | 1.311180  |
| S     | -3.380752 | -0.239309 | 0.457515  |
| O     | -2.769644 | -0.081762 | 1.758671  |
| O     | -3.073136 | 0.902025  | -0.429969 |
| O     | -3.081940 | -1.512628 | -0.184028 |
| H     | -2.145756 | -1.747538 | -1.495636 |
| C     | -0.352326 | -1.151292 | 3.638131  |
| H     | -0.161837 | -2.038803 | 4.234685  |
| H     | -1.363857 | -1.142807 | 3.232807  |
| H     | -0.156843 | -0.242376 | 4.199162  |
| S     | 0.707021  | -1.179657 | 2.247421  |
| O     | 0.510522  | 0.019993  | 1.474837  |
| O     | 0.561143  | -2.434754 | 1.578032  |
| O     | 2.110374  | -1.088098 | 2.898449  |
| H     | 2.710461  | -0.516583 | 2.343792  |
| C     | 5.133324  | 0.642192  | -0.731776 |



|   |          |           |           |
|---|----------|-----------|-----------|
| H | 5.048734 | 0.835176  | -1.797054 |
| H | 5.572150 | -0.335132 | -0.549498 |
| H | 5.703289 | 1.421137  | -0.234095 |
| S | 3.517878 | 0.610806  | -0.048159 |
| O | 3.642807 | 0.423119  | 1.378359  |
| O | 2.734434 | -0.371353 | -0.743488 |
| O | 3.070689 | 2.029833  | -0.374786 |
| H | 2.095029 | 2.304867  | -0.152704 |

**(HIO<sub>3</sub>)<sub>1</sub>(HIO<sub>2</sub>)<sub>2</sub>(MSA)<sub>1</sub>:**

| Atoms | X         | Y         | Z         |
|-------|-----------|-----------|-----------|
| I     | 2.348350  | -0.769952 | -0.370994 |
| O     | 1.654492  | -0.933432 | 1.291176  |
| O     | 3.963063  | -0.109532 | -0.099351 |
| O     | 2.813854  | -2.636535 | -0.606809 |
| H     | 3.520811  | -2.864712 | 0.009545  |
| I     | -2.435446 | -1.030080 | -0.532754 |
| O     | -0.675580 | -1.017821 | -1.293881 |
| O     | -3.255475 | -1.247275 | -2.322592 |
| H     | -3.259906 | -0.405511 | -2.787043 |
| I     | -0.311703 | 0.399257  | 2.003701  |
| O     | -1.453783 | -0.979816 | 1.421811  |
| O     | -1.672202 | 1.741859  | 2.352406  |
| H     | -1.643425 | 2.304136  | 1.558194  |
| C     | 0.742195  | 3.687612  | -2.070912 |
| H     | 1.452733  | 3.361092  | -2.824708 |
| H     | 1.213050  | 4.370788  | -1.369626 |
| H     | -0.127171 | 4.148493  | -2.531313 |
| S     | 0.197366  | 2.274013  | -1.170936 |
| O     | -0.746074 | 2.744114  | -0.175752 |
| O     | 1.404151  | 1.671612  | -0.591398 |
| O     | -0.416216 | 1.381600  | -2.162983 |
| H     | -0.560623 | -0.101299 | -1.693138 |

**(HIO<sub>3</sub>)<sub>1</sub>(HIO<sub>2</sub>)<sub>2</sub>(MSA)<sub>2</sub>:**

| Atoms | X         | Y         | Z         |
|-------|-----------|-----------|-----------|
| I     | -2.274708 | -1.314077 | -1.069938 |
| O     | -1.280980 | 0.083594  | -1.611998 |
| O     | -2.834872 | -0.822265 | 0.570168  |
| O     | -3.863092 | -0.664896 | -2.016261 |
| H     | -3.926249 | 0.294889  | -1.977898 |

|   |           |           |           |
|---|-----------|-----------|-----------|
| I | 0.632696  | -1.618253 | 1.095082  |
| O | -0.580722 | -2.309479 | -0.180893 |
| O | -0.456420 | -1.721741 | 2.682021  |
| H | -0.891987 | -0.855016 | 2.762242  |
| I | 0.688431  | 1.614509  | -1.302574 |
| O | 2.141989  | 2.852309  | -1.109255 |
| O | 1.534733  | 0.503037  | -2.608748 |
| H | 2.035517  | -0.157807 | -2.078329 |
| C | -2.210521 | 3.345329  | 2.878658  |
| H | -2.770544 | 4.077303  | 2.303823  |
| H | -1.320249 | 3.795666  | 3.309752  |
| H | -2.828191 | 2.892116  | 3.648119  |
| S | -1.664285 | 2.084478  | 1.787508  |
| O | -1.022339 | 1.045238  | 2.543856  |
| O | -0.886171 | 2.707518  | 0.750861  |
| O | -2.999114 | 1.580531  | 1.225491  |
| H | -2.947752 | 0.587627  | 0.928655  |
| C | 5.145879  | -1.203340 | 0.025882  |
| H | 5.462625  | -1.041750 | -1.000725 |
| H | 5.004780  | -2.261776 | 0.225378  |
| H | 5.862700  | -0.773971 | 0.720608  |
| S | 3.604091  | -0.383395 | 0.266973  |
| O | 3.190244  | -0.626641 | 1.636474  |
| O | 2.649949  | -1.030216 | -0.671988 |
| O | 3.827983  | 1.010367  | -0.061212 |
| H | 2.840580  | 2.359109  | -0.624881 |

**(HIO<sub>3</sub>)<sub>1</sub>(HIO<sub>2</sub>)<sub>3</sub>(MSA)<sub>1</sub>:**

| Atoms | X         | Y         | Z         |
|-------|-----------|-----------|-----------|
| I     | 3.100541  | -0.494953 | 0.054224  |
| O     | 2.179606  | -1.070771 | 1.483798  |
| O     | 2.472547  | 1.147459  | -0.315090 |
| O     | 4.647763  | 0.187051  | 1.046983  |
| H     | 4.402718  | 0.972847  | 1.546784  |
| I     | 0.062420  | 2.172851  | -0.950176 |
| O     | -1.809613 | 2.599934  | -0.820501 |
| O     | 0.419481  | 3.698110  | -2.140759 |
| H     | 0.228934  | 3.455910  | -3.050887 |
| I     | -1.082332 | 0.306963  | 2.092020  |
| O     | -0.525627 | 0.313681  | 0.284389  |
| O     | 0.668997  | 0.672503  | 2.819187  |
| H     | 1.295934  | -0.000699 | 2.454745  |
| I     | -0.185243 | -1.901950 | -0.896517 |

|   |           |           |           |
|---|-----------|-----------|-----------|
| O | 1.558417  | -1.340313 | -1.301383 |
| O | 0.003276  | -3.716490 | -1.607974 |
| H | -0.125092 | -3.696140 | -2.560272 |
| C | -5.285320 | -0.812393 | -0.216000 |
| H | -5.786708 | 0.143010  | -0.091180 |
| H | -5.534282 | -1.491748 | 0.594069  |
| H | -5.532742 | -1.254333 | -1.177365 |
| S | -3.545561 | -0.530966 | -0.191771 |
| O | -2.903926 | -1.828621 | -0.308546 |
| O | -3.290245 | 0.092168  | 1.128168  |
| O | -3.248350 | 0.375639  | -1.288410 |
| H | -2.341954 | 1.803875  | -1.066678 |

**(HIO<sub>3</sub>)<sub>2</sub>(HIO<sub>2</sub>)<sub>1</sub>(MSA)<sub>1</sub>:**

| Atoms | X         | Y         | Z         |
|-------|-----------|-----------|-----------|
| I     | -2.773171 | -0.569794 | 0.577742  |
| O     | -3.115255 | 0.810216  | -0.492635 |
| O     | -1.860841 | -1.790462 | -0.379870 |
| O     | -1.500766 | 0.059435  | 1.789981  |
| H     | -1.001840 | 0.929412  | 1.478961  |
| I     | 0.168997  | 2.377382  | -0.567292 |
| O     | -0.382966 | 2.188189  | 1.138075  |
| O     | 0.041412  | 0.752066  | -1.270487 |
| O     | -1.481935 | 3.081061  | -1.270734 |
| H     | -2.168376 | 2.402925  | -1.129338 |
| I     | 0.590524  | -2.309932 | -0.694268 |
| O     | 0.649959  | -2.383007 | 1.206637  |
| O     | 2.421517  | -2.794143 | -1.001080 |
| H     | 2.934821  | -1.967440 | -0.840170 |
| C     | 4.280227  | 0.941448  | 1.692637  |
| H     | 3.934820  | 1.617441  | 2.469557  |
| H     | 5.024361  | 1.422211  | 1.063883  |
| H     | 4.676566  | 0.026750  | 2.125015  |
| S     | 2.901359  | 0.510132  | 0.682594  |
| O     | 3.401261  | -0.377603 | -0.351589 |
| O     | 2.430470  | 1.796956  | 0.137610  |
| O     | 1.915552  | -0.104451 | 1.559334  |
| H     | 1.072665  | -1.523873 | 1.475161  |

**(HIO<sub>3</sub>)<sub>2</sub>(HIO<sub>2</sub>)<sub>1</sub>(MSA)<sub>2</sub>:**

| Atoms | X | Y | Z |
|-------|---|---|---|
|-------|---|---|---|

|   |           |           |           |
|---|-----------|-----------|-----------|
| I | 1.093782  | -1.924547 | -1.130100 |
| O | 0.788916  | -2.106659 | 0.671617  |
| O | 2.174892  | -3.259322 | -1.508651 |
| O | -0.532941 | -2.693983 | -1.742588 |
| H | -1.290898 | -2.408139 | -1.167747 |
| I | -0.260065 | -0.431970 | 1.808869  |
| O | -0.040004 | 0.373751  | 0.174644  |
| O | 1.270762  | -0.102861 | 2.655767  |
| O | -1.103125 | 1.122009  | 2.601535  |
| H | -2.038169 | 1.063428  | 2.341988  |
| I | -0.816885 | 2.364153  | -0.728820 |
| O | -1.345194 | 1.183577  | -2.120771 |
| O | -1.576969 | 3.955428  | -1.584113 |
| H | -0.997674 | 4.261083  | -2.287831 |
| C | -4.943314 | -1.579588 | 0.211887  |
| H | -5.685012 | -0.789147 | 0.284178  |
| H | -4.933230 | -2.183615 | 1.114711  |
| H | -5.126029 | -2.197329 | -0.662966 |
| S | -3.359337 | -0.831759 | 0.033773  |
| O | -2.382689 | -1.918557 | -0.030515 |
| O | -3.139910 | -0.018473 | 1.224822  |
| O | -3.424062 | -0.045957 | -1.192370 |
| H | -2.173130 | 0.707090  | -1.814150 |
| C | 5.156706  | 1.385513  | -0.097012 |
| H | 5.394987  | 2.292011  | 0.451764  |
| H | 5.308485  | 1.532078  | -1.163093 |
| H | 5.735971  | 0.540665  | 0.262797  |
| S | 3.451272  | 1.032543  | 0.125257  |
| O | 3.167615  | -0.230034 | -0.510885 |
| O | 2.670833  | 2.156196  | -0.287817 |
| O | 3.422602  | 0.866210  | 1.656187  |
| H | 2.555533  | 0.478486  | 2.004433  |

**(HIO<sub>3</sub>)<sub>2</sub>(HIO<sub>2</sub>)<sub>2</sub>(MSA)<sub>1</sub>:**

| Atoms | X         | Y         | Z         |
|-------|-----------|-----------|-----------|
| I     | 1.638876  | 2.217202  | -0.876994 |
| O     | 3.203167  | 1.345169  | -1.008169 |
| O     | 1.645011  | 2.991477  | 0.731909  |
| O     | 2.207906  | 3.789233  | -1.861349 |
| H     | 2.927213  | 4.227571  | -1.392465 |
| I     | 0.047108  | -0.140936 | 1.660468  |
| O     | -1.424765 | 0.926820  | 1.618775  |

|   |           |           |           |
|---|-----------|-----------|-----------|
| O | 0.843791  | 0.258916  | 0.072686  |
| O | 1.095476  | 1.117886  | 2.666750  |
| H | 1.312649  | 1.900316  | 2.115168  |
| I | -3.401952 | 0.620074  | 0.341882  |
| O | -2.335655 | 0.232535  | -1.137462 |
| O | -5.131298 | 0.380619  | -0.578905 |
| H | -5.300014 | 1.133343  | -1.151360 |
| I | -1.168116 | -1.759971 | -1.326957 |
| O | -1.069978 | -1.635326 | 0.555583  |
| O | -0.063041 | -3.365138 | -1.418258 |
| H | 0.866112  | -3.089567 | -1.318258 |
| C | 4.335450  | -3.200392 | 0.618297  |
| H | 5.030533  | -3.207465 | -0.215828 |
| H | 3.842428  | -4.163437 | 0.721809  |
| H | 4.833440  | -2.924774 | 1.543321  |
| S | 3.077614  | -2.020085 | 0.288754  |
| O | 2.191544  | -1.993737 | 1.421264  |
| O | 2.487423  | -2.307678 | -0.990669 |
| O | 3.922077  | -0.745176 | 0.218596  |
| H | 3.516296  | 0.055401  | -0.273325 |

**(HIO<sub>3</sub>)<sub>3</sub>(HIO<sub>2</sub>)<sub>1</sub>(MSA)<sub>1</sub>:**

| Atoms | X         | Y         | Z         |
|-------|-----------|-----------|-----------|
| I     | -3.106823 | -0.370436 | -0.186573 |
| O     | -2.145238 | -0.846587 | -1.639348 |
| O     | -2.367302 | 1.168568  | 0.358986  |
| O     | -4.533365 | 0.501505  | -1.186345 |
| H     | -4.209031 | 1.297354  | -1.621863 |
| I     | 0.061077  | -2.029060 | 0.951439  |
| O     | -1.738609 | -1.620778 | 1.064687  |
| O     | 0.112706  | -3.645227 | 1.641637  |
| O     | -0.024593 | -2.465220 | -0.911670 |
| H     | -0.820554 | -2.007643 | -1.267731 |
| I     | 0.035066  | 2.050355  | 1.086344  |
| O     | 1.860668  | 2.529156  | 1.051454  |
| O     | 0.028319  | 0.731457  | 2.264618  |
| O     | -0.336960 | 3.459422  | 2.364098  |
| H     | 0.015508  | 3.230682  | 3.232029  |
| I     | 1.107430  | 0.609985  | -2.134574 |
| O     | 0.571602  | 0.435722  | -0.333269 |
| O     | -0.645515 | 1.197801  | -2.746282 |
| H     | -1.277691 | 0.480487  | -2.534567 |
| C     | 5.189397  | -1.069024 | -0.041490 |

|   |          |           |           |
|---|----------|-----------|-----------|
| H | 5.790078 | -0.188883 | -0.251452 |
| H | 5.293215 | -1.811758 | -0.827119 |
| H | 5.449669 | -1.494011 | 0.924183  |
| S | 3.499037 | -0.583334 | 0.037939  |
| O | 2.724920 | -1.783507 | 0.274350  |
| O | 3.229755 | 0.011272  | -1.299116 |
| O | 3.397067 | 0.414591  | 1.089765  |
| H | 2.442469 | 1.711174  | 1.058207  |

---

## Supplementary Reference

- Elm, J. and Kristensen, K.: Basis set convergence of the binding energies of strongly hydrogen-bonded atmospheric clusters, *Phys. Chem. Chem. Phys.*, 19, 1122–1133, <http://doi.org/10.1039/c6cp06851k>, 2017.
- Francl, M. M., Pietro, W. J., Hehre, W. J., Binkley, J. S., Gordon, M. S., DeFrees, D. J. and Pople, J. A.: Self-consistent molecular orbital methods. XXIII. A polarization-type basis set for second-row elements, *J. Chem. Phys.*, 77, 3654–3665, <http://doi.org/10.1063/1.444267>, 1982.
- Frisch, M. J., Trucks, G. W., Schlegel, H. B., Scuseria, G. E., Robb, M. A., Cheeseman, J. R., Scalmani, G., Barone, V., Mennucci, B., Petersson, G. A., Nakatsuji, H., Caricato, M., Li, X., Hratchian, H. P., Izmaylov, A. F., Bloino, J., Zheng, G., Sonnenberg, J. L., Hada, M., Ehara, M., Toyota, K., Fukuda, R., Hasegawa, J., Ishida, M., Nakajima, T., Honda, Y., Kitao, O., Nakai, H., Vreven, T., Montgomery, J. A., Peralta, J. E., Ogliaro, F., Bearpark, M., Heyd, J. J., Brothers, E., Kudin, K. N., Staroverov, V. N., Kobayashi, R., Normand, J., Raghavachari, K., Rendell, A., Burant, J. C., Iyengar, S. S., Tomasi, J., Cossi, M., Rega, N., Millam, J. M., Klene, M., Knox, J. E., Cross, J. B., Bakken, V., Adamo, C., Jaramillo, J., Gomperts, R., Stratmann, R. E., Yazyev, O., Austin, A. J., Cammi, R., Pomelli, C., Ochterski, J. W., Martin, R. L., Morokuma, K., Zakrzewski, V. G., Voth, G. A., Salvador, P., Dannenberg, J. J., Dapprich, S., Daniels, A. D., Farkas, O., Foresman, J. B., Ortiz, J. V., Cioslowski, J. and Fox, D. J.: Gaussian 09, Revision A.02, Gaussian Inc, Wallingford CT, <https://gaussian.com/g09citation/> (last access: 07 May 2022), 2009.
- Peterson, K. A., Figgen, D., Goll, E., Stoll, H. and Dolg, M.: Systematically convergent basis sets with relativistic pseudopotentials. II. Small-core pseudopotentials and correlation consistent basis sets for the post-d group 16–18 elements, *J. Chem. Phys.*, 119, 11113–11123, <http://doi.org/10.1063/1.1622924>, 2003.
- Rappé, A. K., Casewit, C. J., Colwell, K. S., Goddard, W. A. and Skif, W. M.: UFF, a Full Periodic Table Force Field for Molecular Mechanics and Molecular Dynamics Simulations, *J. Am. Chem. Soc.*, 114, 10024–10035, <http://doi.org/10.1021/ja00051a040>, 1992.
- Stewart, J. J.: Optimization of parameters for semiempirical methods VI: more modifications to the NDDO approximations and re-optimization of parameters, *J. Mol. Model.*, 19, 1–32, <http://doi.org/10.1007/s00894-012-1667-x>, 2013.
- Stewart, J. J. P.: MOPAC 2016, Colorado Springs, CO (USA), <http://openmopac.net/MOPAC2016.html>, 2016.
- Zhang, J. and Dolg, M.: ABCluster: the artificial bee colony algorithm for cluster global optimization, *Phys. Chem. Chem. Phys.*, 17, 24173–24181, <http://doi.org/10.1039/c5cp04060d>, 2015.
